1 ***Acinetobacter baumannii* defends against oxidative stress through**  
2 **a Mn<sup>2+</sup>-dependent small RNA-mediated suppression of type VI**  
3 **secretion system**

4 Somok Bhowmik,<sup>1</sup> Avik Pathak,<sup>1</sup> Kuldeep Devnath,<sup>1</sup> Tarun Kumar Sharma,<sup>3,4</sup> Ramandeep  
5 Singh,<sup>3</sup> Saurabh Chugh,<sup>3</sup> and Ranjana Pathania<sup>1,2,5,\*</sup>

6 <sup>1</sup>Department of Biosciences and Bioengineering, Indian Institute of Technology Roorkee,  
7 Uttarakhand-247667, India

8 <sup>2</sup>Centre of Excellence in Disaster Mitigation and Management, Indian Institute of Technology  
9 Roorkee, Uttarakhand-247667, India

10 <sup>3</sup>Translational Health Science and Technology Institute, Faridabad, Haryana-121001, India

11 <sup>4</sup>Present address: Department of Medical Biotechnology, Gujarat Biotechnology University,  
12 Gujarat-382355, India

13 <sup>5</sup>Lead Contact

14 \*Correspondence: ranjana.pathania@bt.iitr.ac.in

15 Running title: A Mn<sup>2+</sup>-dependent sRNA-mediated repression of T6SS

16 **SUMMARY**

17 *Acinetobacter baumannii* employs a plethora of strategies during infection to compete with  
18 other pathogens and mitigate host-mediated oxidative stress. *A. baumannii* utilizes the type  
19 VI secretion system (T6SS) to induce contact-dependent killing off the competitor microbes.  
20 However, the role of T6SS during host-induced oxidative stress is not explored in *A.*  
21 *baumannii*. Here, we show that *A. baumannii* T6+ cells cannot cope with phagocytic cell-  
22 mediated oxidative stress due to inadequate uptake of Mn<sup>2+</sup>, which is crucial for bacterial  
23 physiology and reactive oxygen species (ROS) breakdown. Deleting the Mn<sup>2+</sup>-uptake system  
24 (MntH) causes a significant increase in the T6+ population, stipulating a deleterious effect on

25 T6SS modulation in *A. baumannii*. Intriguingly, we identify a bonafide sRNA, AbsR28, that  
26 meditates the crosstalk between MntH and T6SS. This work elucidates a detailed mechanism  
27 of Mn<sup>2+</sup>-dependent AbsR28-mediated post-transcriptional repression of T6SS, exploited by *A.*  
28 *baumannii* to survive in the host and establish pathogenesis.

29 **Keywords:** Mn<sup>2+</sup>-uptake, MntH, manganese, sRNA, AbsR28, post-transcriptional regulation,  
30 phagocytic cell, oxidative stress, bacterial pathogenesis, pneumonia

## 31 INTRODUCTION

32 *Acinetobacter baumannii* is a Gram-negative pathogen and has gained importance due to its  
33 ability to cause wound and burn infections, sepsis, meningitis, urinary tract infection,  
34 bloodstream infection, and ventilator-associated pneumonia (Bergogne-Berezin and Towner,  
35 1996; Dexter et al., 2015; Falagas et al., 2006; Munoz-Price et al., 2010; Peleg et al., 2008).  
36 Treating hospital-acquired *A. baumannii* infections is a major issue because most *A.*  
37 *baumannii* clinical strains are multidrug-resistant (MDR) (Kaye and Pogue, 2015). Due to this  
38 severe global impact on public health, it is essential to identify molecular machinery adapted  
39 by *A. baumannii* to escape from host-mediated immune responses and establish  
40 pathogenesis to design new treatment strategies.

41 One of the vital host-mediated immune responses pathogens come across is the  
42 neutrophil-mediated free metal ions limitation and generation of ROS at the site of infection  
43 termed “host-mediated nutritional immunity” (Hood and Skaar, 2012; Porcheron et al., 2013).  
44 Mn<sup>2+</sup> sequestration by neutrophils at the site of infection reduces bacterial superoxide  
45 dismutase (SOD) and catalase activity which bacteria utilize to break down ROS (Hood and  
46 Skaar, 2012; Kehl-Fie et al., 2011). To acquire Mn<sup>2+</sup> required for survival under oxidative stress  
47 and metabolism and regulation of various virulence factors, *A. baumannii* utilizes a high-affinity  
48 Mn<sup>2+</sup> acquisition system *mumT* (mentioned as *mntH* in the current study as per other literature;  
49 manganese transporter H<sup>+</sup>-dependent) against neutrophil-mediated metal sequestration  
50 (Juttukonda et al., 2016).

51 Recently, a synergism between Mn<sup>2+</sup>-transporter and type VI secretion system (T6SS) has  
52 been observed in *Burkholderia thailandensis*, which helps to counter oxidative stress (Si et al.,  
53 2017b). T6SS is one of the robust secretion systems utilized by pathogens to deliver toxins  
54 into competitors or promote contact-dependent killing (Cao et al., 2016; García-Bayona et al.,  
55 2017; Souza et al., 2015; Vassallo et al., 2017). Although Mn<sup>2+</sup>-uptake systems have been  
56 reported as one of the major virulence factors in Gram-negative and Gram-positive pathogens  
57 (Juttukonda and Skaar, 2015; Kehres and Maguire, 2003), crosstalk of Mn<sup>2+</sup>-transporter  
58 (*mntH*) and T6SS remains unknown in *A. baumannii*.

59 The dynamics of T6SS assembly is an enormous and energetically expensive process for  
60 bacteria (Basler, 2015). As a contact-dependent system with specific cellular targets  
61 (Silverman et al., 2012), its expression must be precisely regulated transcriptionally and post-  
62 transcriptionally (Bernard et al., 2010; Silverman et al., 2012). Negative transcriptional  
63 regulation of T6SS by *tetR*-like regulators is observed in *A. baumannii* (Weber et al., 2015),  
64 but the mechanistic details are unknown. The major players in post-transcriptional regulation  
65 in bacteria are small regulatory RNAs (sRNAs). The sRNAs are mostly 50-500 nucleotides  
66 long, function as global regulators of numerous bacterial physiological processes, and play a  
67 crucial role in regulating several virulence factors (Gripenland et al., 2010; Romby et al., 2006).  
68 The sRNAs bind to their cognate mRNA and modulate the translational activity and/or the  
69 stability of that particular mRNA with the assistance of RNA chaperone Hfq (Franze de  
70 Fernandez et al., 1968; Schuppli et al., 2000). Recent studies demonstrated the sRNA-  
71 mediated post-transcriptional regulation of T6SS in bacteria. However, sRNA-mediated  
72 regulation of T6SS modulation in *A. baumannii* is not explored yet.

73 In this work, we set out to investigate the effect of T6SS expression in *A. baumannii*'s  
74 survival under oxidative stress, to check the crosstalk between Mn<sup>2+</sup>-transporter and T6SS, to  
75 understand the detailed molecular mechanism of the crosstalk and its relevance in  
76 pathogenesis in the host. Herein, we show that *A. baumannii* T6+ cells grow poorly under  
77 oxidative stress owing to insufficient intracellular Mn<sup>2+</sup>. We observed that deletion of *MntH*  
78 increases the proportion of T6+ cells in a population, showing a detrimental influence on T6SS

79 regulation in *A. baumannii*. We elucidate that the uptake of  $Mn^{2+}$  by MntH is necessary for  
80 AbsR28-mediated post-transcriptional suppression of T6SS to counter phagocytic cell-  
81 mediated oxidative stress and establish pathogenesis in a mouse pneumonia model.

## 82 RESULTS

### 83 ***A. baumannii* T6+ cells are susceptible to oxidative stress due to inadequate** 84 **intracellular $Mn^{2+}$ .**

85 Over the past few years, several studies have demonstrated the role of T6SS in bacteria in  
86 the acquisition of metal ions which helps the bacteria to survive within-host niches in metal-  
87 limited conditions (Lin et al., 2017; Si et al., 2017a; 2017b). To assess the role of T6SS in *A.*  
88 *baumannii*'s survival under phagocytic cell-mediated oxidative stress, we infected the  
89 phagocytic cell (human blood-derived neutrophil and macrophage RAW 264.7 cell line) with  
90 isolated wild-type (WT) T6- and T6+ cells separately. WT T6- and WT T6+ cells were isolated  
91 from the *A. baumannii* population based on Hcp (hemolysin-coregulated protein) secretion by  
92 Hcp-ELISA followed by Hcp-Western blot where cells that expressed Hcp were considered as  
93 T6SS+ (WT T6+) and the cells that showed no detectable Hcp were considered as T6SS- (WT  
94 T6-) (Figure S1A). To our surprise, WT T6- cells exhibited ~60-70% survival, whereas WT T6+  
95 cells exhibited only ~20-30% survival against phagocytic cell-mediated killing compared to  
96 their respective untreated controls (Figure 1A and S1B). This suggests that WT T6+ cells  
97 cannot withstand phagocytic cell-mediated oxidative stress. To investigate the role of T6SS in  
98 *A. baumannii* during oxidative stress, we performed a growth assay of WT T6- and WT T6+  
99 cells in nutrient-rich media (LB broth) supplemented with 250  $\mu$ M methyl viologen (MV) to  
100 induce oxidative stress (Ahn et al., 2016; Coady et al., 2015; Hassan and Fridovich, 1977) and  
101 measured the  $OD_{600}$  at the indicated time points. The deletion mutant of TssM (a structural  
102 component of T6SS) does not express T6SS in *A. baumannii* (Repizo et al., 2015; Weber et  
103 al., 2013). So a deletion mutant of *tssM* in *A. baumannii* ( $\Delta tssM$ ) was used as a T6- control in  
104 this growth assay. All the three strains displayed equal growth in only LB, but when MV was  
105 added, WT T6+ cells exhibited a significant growth defect (Figure 1B). This strengthens our

106 previous observation that WT T6<sup>+</sup> cells display enhanced sensitivity to oxidative stress  
107 compared with WT T6<sup>-</sup> cells. Intracellular ROS generation is a hallmark of an oxidative stress  
108 response (Hong et al., 2019; Schieber and Chandel, 2014). Next, we measured intracellular  
109 ROS generation in both the WT T6<sup>-</sup> and WT T6<sup>+</sup> cells in either LB broth or LB broth  
110 supplemented with MV (250  $\mu$ M). A significant increase in ROS generation was observed in  
111 WT T6<sup>+</sup> cells compared to WT T6<sup>-</sup> cells treated with MV (Figure 1C), suggesting that WT T6<sup>+</sup>  
112 cells are more sensitive to oxidative stress due to higher intracellular ROS accumulation. To  
113 survive against oxidative stress and host-mediated metal limitation, *A. baumannii* employs  
114 specialized metal uptake systems such as TonB-transporter, ZnuABC transporter, and MntH-  
115 transporter for the acquisition of Fe<sup>2+/3+</sup>, Zn<sup>2+</sup> and Mn<sup>2+</sup>, respectively (Hood et al., 2012;  
116 Juttukonda et al., 2016; Mortensen and Skaar, 2013; Zimble et al., 2013). Due to the  
117 compromised survival of WT T6<sup>+</sup> cells in phagocytic cell-mediated killing, we hypothesized  
118 that WT T6<sup>+</sup> cells are defective in uptaking of free metal ions and cannot utilize them to break  
119 down the ROS. To test this hypothesis, we infected neutrophils with WT T6<sup>-</sup> and WT T6<sup>+</sup> cells  
120 separately and checked the expression of *mntH*, *znuB*, and *tonB* transcripts involved in Mn<sup>2+</sup>-  
121 uptake, Zn<sup>2+</sup>-uptake, and Fe<sup>2+/3+</sup>-uptake, respectively, by quantitative reverse transcription  
122 PCR (qRT-PCR). There was no significant difference in the transcription of *znuB* and *tonB*  
123 genes, but in the case of *mntH* transcript, ~3.5-log<sub>2</sub> fold reduction was observed in WT T6<sup>+</sup>  
124 cells with respect to WT T6<sup>-</sup> cells (Figure 1D). Due to the fold reduction of *mntH* transcript in  
125 WT T6<sup>+</sup> cells, we assumed there would be intracellular Mn<sup>2+</sup> deficiency in WT T6<sup>+</sup> cells under  
126 oxidative stress. To examine this, we grew both the WT T6<sup>-</sup> and WT T6<sup>+</sup> cells in minimal  
127 media (M9-media) containing Casamino acid as a nutrient source (carbon) supplemented with  
128 either MV or MnCl<sub>2</sub> or both (100  $\mu$ M) and measured intracellular Mn<sup>2+</sup> concentration by  
129 inductively coupled plasma mass spectrometry (ICP-MS). The WT T6<sup>+</sup> cells had ~3-fold lower  
130 Mn<sup>2+</sup> levels in cell pellets than WT T6<sup>-</sup> cells (Figure 1E). In contrast, there were no significant  
131 differences in Zn<sup>2+</sup> and Fe<sup>2+/3+</sup> levels in cell pellets of WT T6<sup>+</sup> cells compared to the WT T6<sup>-</sup>  
132 cells (Figure S1C) when grown in M9-media containing Casamino acid supplemented with  
133 MV+ZnSO<sub>4</sub> and MV+FeCl<sub>3</sub> (100  $\mu$ M), respectively. Next, we wanted to check if the

134 supplementation of metal ions (i.e.,  $Mn^{2+}$ ,  $Zn^{2+}$ , and  $Fe^{2+/3+}$ ) could revert the growth of WT T6-  
135 and WT T6+ cells under oxidative stress. To assess this, WT T6- and WT T6+ strains were  
136 grown in nutrient-rich media (LB broth) in the presence of MV (150  $\mu$ M) and supplemented  
137 with either  $MnCl_2$ ,  $ZnSO_4$ , or  $FeCl_3$ . The WT T6- strain grew almost equally in all conditions,  
138 whereas supplementation of  $ZnSO_4$  and  $FeCl_3$  reverted the growth of WT T6+ cells to some  
139 extent, but supplementation of  $MnCl_2$  did not revert the growth (Figure 1F, Figure S1D, and  
140 S1E). Taken together, these data suggest that WT T6+ cells display impaired growth under  
141 oxidative stress due to defects in  $Mn^{2+}$ -uptake, which is required as a cofactor for SOD and  
142 catalase to break down intracellular ROS.

143 *A. baumannii* ATCC 17978 strain contains pAB3 plasmid, which represses the T6SS  
144 through *tetR*-like regulators present in that plasmid and upon losing the plasmid, *A. baumannii*  
145 T6- cells switch to T6+ cells (Weber et al., 2015). First, we checked the presence of pAB3  
146 plasmid and *hcp* in both the isolated WT T6- and WT T6+ cells by PCR, and no band for both  
147 the *tetR1* and *tetR2* in WT T6+ cells confirmed the loss of pAB3 which was consistent with the  
148 previous observation (Figure S2A). Next, we wanted to test whether the presence of pAB3  
149 affects sensitivity to oxidative stress. To check this, we transformed pAB3 into the WT T6+  
150 competent cells, confirmed the transformants (Figure S2B), and assessed the growth of WT  
151 T6-, WT T6+, and WT T6+-pAB3 in LB supplemented with MV (250  $\mu$ M). Interestingly, all the  
152 three strains displayed equal growth in only LB, but when MV was added, both the WT T6+  
153 and WT T6+-pAB3 cells exhibited a significant growth defect compared with WT T6- cells  
154 (Figure S2C). This confirms that pAB3 has no role in mediating sensitivity to oxidative stress.

155 **Deletion of *mntH* in *A. baumannii* results in more T6+ cells in the population under**  
156 **oxidative stress.**

157  $Mn^{2+}$  is an essential micronutrient for bacterial physiology, virulence, and survival against  
158 oxidative stress (Juttukonda and Skaar, 2015). Recently, it has been observed in *B.*  
159 *thailandensis* that T6SS secretes an effector protein TseM that scavenges extracellular  $Mn^{2+}$   
160 and thus helps  $Mn^{2+}$ -transporter to take up extracellular  $Mn^{2+}$  under oxidative stress (Si et al.,

161 2017b). However, any crosstalk of Mn<sup>2+</sup>-transporter and T6SS in *A. baumannii* is not yet  
162 established, and we observed that WT T6<sup>+</sup> cells cannot uptake extracellular Mn<sup>2+</sup>. So we were  
163 curious to know the effect of Mn<sup>2+</sup>-transporter (*mntH*) on T6SS under oxidative stress. To  
164 evaluate this, we created a deletion mutant of *mntH* in *A. baumannii* ATCC 17978 ( $\Delta mntH$ ),  
165 grew both the WT T6<sup>-</sup> and  $\Delta mntH$  cells in LB supplemented with MnCl<sub>2</sub> (250  $\mu$ M) to an OD<sub>600</sub>  
166 of 0.6 (mid-log phase), incubated with MV (250  $\mu$ M) and checked the expression of *hcp*  
167 transcript by qRT-PCR. Hcp is a structural component of T6SS and a hallmark for the  
168 expression of T6SS (Figure 2A). Interestingly, we observed  $\sim 6$ -log<sub>2</sub> fold upregulation of *hcp*  
169 transcript in  $\Delta mntH$  cells with respect to WT T6<sup>-</sup> cells (Figure 2B). The data was further  
170 validated by Hcp-Western Blot, where Hcp expression was highly induced in  $\Delta mntH$  cells with  
171 compare to WT T6<sup>-</sup> cells in both cell lysate (CL) and culture supernatant (S) (Figure 2C). To  
172 determine the T6SS-mediated killing of prey cells by WT T6<sup>-</sup> and  $\Delta mntH$  cells (predator/killer  
173 cells), we performed a prey-predator assay in three different ways (counting the CFU of  
174 survived prey cells, spot assay, and measuring the GFP of prey cells) using *E. coli* J53, *E.*  
175 *coli*-pNYL GFP, and *Pseudomonas aeruginosa* PAO1 as prey cells. As expected,  $\Delta mntH$  cells  
176 exhibited an efficient increase in the killing of prey cells in all three assays compared to WT  
177 T6<sup>-</sup> cells (Figure 2D-F). Next, we wanted to quantify the percentage of bacteria that switch  
178 from T6<sup>-</sup> cells to T6<sup>+</sup> cells under oxidative stress. To determine this, we grew the WT T6<sup>-</sup> and  
179  $\Delta mntH$  cells in LB supplemented with MnCl<sub>2</sub> (250  $\mu$ M) to an OD<sub>600</sub> of 0.6 (mid-log phase),  
180 incubated with MV (250  $\mu$ M) for 2 h, and performed Hcp-ELISA. The percentage of switching  
181 to T6<sup>+</sup> in  $\Delta mntH$  cells was  $\sim 50\%$  of the total population, whereas only  $\sim 5\%$  of the total  
182 population was T6<sup>+</sup> in WT T6<sup>-</sup> cells (Figure 2G and S3B). Together these data suggest that,  
183 unlike *B. thailandensis*, there is a negative impact of MntH expression on T6SS modulation in  
184 *A. baumannii* under oxidative stress.

### 185 **AbsR28 mediates the crosstalk between *mntH* and T6SS in *A. baumannii*.**

186 In bacteria, sRNAs are the major stress response post-transcriptional regulators (Holmqvist  
187 and Wagner, 2017). As the deletion of *mntH* in *A. baumannii* displayed an upregulation of

188 T6SS under oxidative stress, we wondered if this might be because of some sRNA-mediated  
189 post-transcriptional regulation triggered upon deletion of *mntH*. In 2014, the presence of thirty-  
190 one putative sRNAs in *A. baumannii* was predicted using bioinformatic analysis, and out of  
191 these thirty-one, three sRNAs were validated by Northern blot and RACE mapped (Sharma et  
192 al., 2014). To test our hypothesis as well as to assess their role in T6SS regulation, if any, we  
193 checked the expression of five sRNAs (out of these thirty-one) and *hfq* at the transcription  
194 level in WT T6-, WT T6+, and  $\Delta mntH$  cells grown in LB broth supplemented with  $MnCl_2$  (250  
195  $\mu M$ ) followed by incubation with MV (250  $\mu M$ ) using qRT-PCR. Intriguingly, the expression of  
196 only one sRNA, AbsR28, showed a significant fold reduction in both the WT T6+ and  $\Delta mntH$   
197 cells (~3 and ~4 log<sub>2</sub> fold reduction in WT T6+ and  $\Delta mntH$  cells, respectively) compared with  
198 WT T6- cells (Figure 3A). Due to the fold reduction of AbsR28 transcript in WT T6+ cells and  
199 sequence conservation amongst *Acinetobacter* sp. (Figure S4A), we focused our study on  
200 evaluating the role of AbsR28 in *A. baumannii* T6SS regulation under oxidative stress. To  
201 identify genes regulated by AbsR28, we created a deletion mutant of AbsR28 in *A. baumannii*  
202 ATCC 17978 ( $\Delta AbsR28$ ), confirmed no polar effect (Figure S4B and S4C), and performed  
203 RNA-seq analysis comparing the relative abundance of total mRNA transcripts of WT T6- and  
204  $\Delta AbsR28$  cells grown in LB supplemented with  $MnCl_2$  (250  $\mu M$ ) to an OD<sub>600</sub> of 0.6 (mid-log  
205 phase) and treated with MV (250  $\mu M$ ) for 2 h. In comparison between WT T6- and  $\Delta AbsR28$   
206 strain, the expression of five structural genes of T6SS (A1S\_1296, A1S\_1298, A1S\_1299,  
207 A1S\_1300, and A1S\_1304) and six genes encoding VgrGs/T6SS effectors molecules  
208 (A1S\_0086, A1S\_0550, A1S\_0551, A1S\_1290, and A1S\_3363) displayed a significant fold-  
209 induction in  $\Delta AbsR28$  strain (Figure 3B). Further, we checked the expression of all the  
210 structural genes of T6SS in WT T6- and  $\Delta AbsR28$  strain grown in LB supplemented with  $MnCl_2$   
211 (250  $\mu M$ ) to an OD<sub>600</sub> of 0.6 (mid-log phase) and treated with MV (250  $\mu M$ ) for 2 h by qRT-  
212 PCR. All the transcripts encoding for T6SS displayed a significant fold-increase in  $\Delta AbsR28$   
213 cells compared to WT T6- cells indicating that AbsR28 negatively regulates T6SS in *A.*  
214 *baumannii* under oxidative stress (Figure 3C). Next, we wanted to determine whether AbsR28  
215 directly regulates T6SS in *A. baumannii* and the importance of  $Mn^{2+}$  in this regulation. To



216 evaluate this, we cloned AbsR28 under an arabinose inducible promoter in pWBAD30 vector  
217 and complemented the  $\Delta$ AbsR28 strain to check the expression of Hcp under oxidative stress  
218 with or without the presence of  $Mn^{2+}$ . We observed that the elevated level of AbsR28 due to  
219 arabinose pulse, decreased the expression of Hcp, and the expression of Hcp was significantly  
220 reduced when grown in the presence of  $Mn^{2+}$  in  $\Delta$ AbsR28-pWBAD30AbsR28 strain (Figure  
221 3D-F). This indicates that AbsR28 represses T6SS in *A. baumannii* under oxidative stress  
222 supplemented with  $MnCl_2$ . Next, we hypothesized that  $Mn^{2+}$  might bind to AbsR28 and alters  
223 its native structure which might be required for its function. Isothermal titration calorimetry  
224 (ITC) assay exhibited sequential binding affinities ( $K$ ) of  $K_1= 1.28 \times 10^5 \pm 1.1 \times 10^4 M^{-1}$ ,  $K_2=$   
225  $3.08 \times 10^4 \pm 3.5 \times 10^3 M^{-1}$ , and  $K_3= 7.36 \times 10^3 \pm 4.1 \times 10^2 M^{-1}$  indicating that  $Mn^{2+}$  binds to AbsR28  
226 and the binding is thermodynamically favorable (Figure 3G and S5B). To determine whether  
227 the binding of  $Mn^{2+}$  affects the native structure of AbsR28, we performed in-vitro structural  
228 probing with 5'-end labeled [ $\gamma$ - $^{32}P$ ]ATP AbsR28 using lead acetate (PbAc), which potentially  
229 cleaves the RNA flexible regions. This structural probing was done in a modified structure  
230 buffer with an increasing concentration of  $MnCl_2$ .  $Mn^{2+}$ -dependent changes were observed in  
231 the gel (Figure 3H), which were not obvious in the presence of  $MgCl_2$  and  $ZnSO_4$  (Figure S5C).  
232 Interestingly, we observed that a region of AbsR28 (G82 to C89) has an almost similar  
233 sequence with a region of  $Mn^{2+}$ -sensing *yybP-ykoY* riboswitch (G38 to C45) (Figure 3I), which  
234 is shown to be involved in  $Mn^{2+}$ -binding (Price et al., 2015). Taken together, these data confirm  
235 that  $Mn^{2+}$  binds to AbsR28 and alters its native structure, which is needed for T6SS  
236 modulation.

### 237 **$Mn^{2+}$ is required for AbsR28 to interact with *tssM* mRNA.**

238 sRNAs regulate the expression of target mRNA by direct complementary base-pairing with it  
239 (Balasubramanian and Vanderpool, 2013). Since T6SS in *A. baumannii* is a large gene cluster  
240 (Cianfanelli et al., 2016), we used the CopraRNA bioinformatics tool to predict the targets of  
241 AbsR28 in *A. baumannii*. CopraRNA search using whole-genome sequences of *A. baumannii*  
242 ATCC 17978 and full-length AbsR28 as inputs suggested base pairing between *tssM* and

243 AbsR28 with a predicted hybridization energy value of -14.10 kcal/mol (Figure 4A). To further  
244 test for direct interaction between AbsR28 and *tssM*, an in-vitro RNA-RNA interaction study  
245 was performed using a gel retardation assay. The addition of full-length AbsR28 at increasing  
246 concentrations to *tssM* resulted in retardation of *tssM* in a native gel when MnCl<sub>2</sub> was added  
247 to the structure buffer (Figure 4B). To our surprise, the retardation of *tssM* was very weak  
248 under the same condition except for the structure buffer containing MgCl<sub>2</sub> (Figure 4C and 4D).  
249 Collectively, these findings indicate that the base-pairing of AbsR28 and *tssM* is Mn<sup>2+</sup>-  
250 dependent.

### 251 **AbsR28 potentiates RNase E mediated degradation of *tssM* mRNA and represses T6SS.**

252 To study the detailed molecular mechanism of AbsR28 mediated T6SS repression in *A.*  
253 *baumannii*, we checked the effect of AbsR28 on the stability of target RNA (i.e., *tssM*) by in-  
254 vivo pulse expression study. *A. baumannii* ΔAbsR28 strain carrying pWBAD30-AbsR28 or  
255 pWBAD30 were grown in LB supplemented with MnCl<sub>2</sub> (250 μM) to an OD<sub>600</sub> of 0.6 (mid-log  
256 phase) and treated with MV (250 μM) for 2 h, cells were harvested and induced the expression  
257 of AbsR28 by adding L-arabinose (0.2% final conc. v/v). Rifampicin (400 μg/mL) was added  
258 to the samples, and then total RNA samples were collected at the indicated time points and  
259 monitored for *tssM* levels using qRT-PCR. Our data reveal that expression of AbsR28 in the  
260 presence of MnCl<sub>2</sub> significantly reduces the stability of *tssM* mRNA in vivo (Figure 4E). It has  
261 been reported that base-pairing of trans-acting sRNA with its target mRNA potentiates RNase  
262 E mediated degradation of the target mRNA in an Hfq-dependent manner and represses the  
263 translation. We hypothesized that this might also be happening in our case, where AbsR28  
264 base-pairs with *tssM* mRNA, triggers RNase E mediated degradation of *tssM*, hence  
265 represses T6SS in *A. baumannii*. To examine this, we performed in vitro RNase E mediated  
266 degradation assay where the 5'-end of the in vitro transcribed *tssM* was labeled with [ $\gamma$ -  
267 <sup>32</sup>P]ATP and incubated with RNase E in the presence or absence of unlabeled AbsR28 and  
268 *A. baumannii* Hfq72 or *E. coli* Hfq protein. RNase E alone cleaves *tssM*, but the cleavage is  
269 prominent in the presence of AbsR28. As expected, in the presence of AbsR28 and Hfq, the

270 RNase E-mediated degradation of *tssM* is more evident than alone (Figure 4F). Taken  
271 together, these data indicate that AbsR28 represses T6SS in *A. baumannii* through base-  
272 pairing with *tssM* mRNA in the presence of Mn<sup>2+</sup> followed by RNase E mediated degradation  
273 of *tssM*.

274 **Mn<sup>2+</sup>-dependent AbsR28 mediated T6SS repression is required for *A. baumannii* to**  
275 **survive in the host and establish pathogenesis.**

276 To understand the significance of Mn<sup>2+</sup>-dependent AbsR28 mediated T6SS repression in *A.*  
277 *baumannii* pathogenesis, we infected the human blood-derived neutrophils with WT T6-, WT  
278 T6+,  $\Delta mntH$ , and  $\Delta AbsR28$  cells separately and checked their survival. Consistent with our  
279 previous observation, WT T6- cells exhibited ~85% survival, whereas WT T6+ cells showed  
280 only ~40% survival against neutrophil-mediated killing compared with their respective  
281 untreated cells. In contrast,  $\Delta mntH$  and  $\Delta AbsR28$  cells exhibited ~60% and ~40% survival,  
282 respectively (Figure 5A). This suggests that Mn<sup>2+</sup>-dependent AbsR28 mediated T6SS  
283 repression in *A. baumannii* is required to withstand phagocytic cell-mediated oxidative stress.  
284 We next assessed the role of AbsR28 mediated T6SS regulation in a mouse model of *A.*  
285 *baumannii* pneumonia. The WT T6-, WT T6+,  $\Delta mntH$ , and  $\Delta AbsR28$  strains were intranasally  
286 inoculated in BALB/c mice (n=8 for each group). After 36 h of post-infection, bacterial organ  
287 burden was enumerated in both lungs and liver. WT T6+,  $\Delta mntH$ , and  $\Delta AbsR28$  strains had  
288 significantly reduced burdens in the lungs and liver (Figure 5B) compared with the WT T6-  
289 strain. Lungs isolated from the mice infected with WT T6- strain exhibited a significant tissue  
290 infiltration as indicated by necrosis and alveolar inflammation, whereas the mice lungs infected  
291 with either WT T6+,  $\Delta mntH$ , and  $\Delta AbsR28$  strains did not show any significant damage (Figure  
292 5C). We checked the Hcp expression in the lung homogenates isolated from the infected mice  
293 and observed high Hcp expression in WT T6+,  $\Delta mntH$ , and  $\Delta AbsR28$  strains infected lungs,  
294 whereas WT T6- strains infected lungs showed no detectable Hcp (Figure S7A). These results  
295 demonstrate the crucial role of AbsR28 in T6SS repression to establish *A. baumannii* infection  
296 in the host.

## 297 DISCUSSION

298 During bacterial infection, the host recruits phagocytic cells at the site of infection, which  
299 creates oxidative stress. In addition, neutrophils sequester free metal ions at the site of  
300 infection by secreting proteins with a high affinity for metal ions (Monteith and Skaar, 2021;  
301 Murdoch and Skaar, 2022; Juttukonda et al., 2016; Weinberg, 1975). Bacteria also utilize  
302 T6SS to counter oxidative stress and host-mediated free metal restriction (Lin et al., 2017; Si  
303 et al., 2017a; 2017b). However, the role of T6SS in *A. baumannii* to survive under phagocytic  
304 cell-mediated oxidative stress is not explored yet. Our study reveals that *A. baumannii* cells  
305 which express T6SS (WT T6+), are sensitive to oxidative stress due to inadequate uptake of  
306  $Mn^{2+}$  which is required to break down intracellular ROS generated during oxidative stress  
307 (Figure 1). This is a different observation from the recent studies, which revealed that secretion  
308 of metal scavenging effectors through T6SS helps bacteria to uptake of metal ions from the  
309 extracellular milieu and enables them to survive under oxidative stress and within-host niches  
310 in metal-limited conditions.

311 During oxidative stress, *B. thailandensis* secretes TseM through T6SS, which  
312 sequesters  $Mn^{2+}$  ions and helps in the uptake of  $Mn^{2+}$ , thus mediating a synergy between  $Mn^{2+}$ -  
313 uptake system and T6SS (Si et al., 2017b). But in our current study, we observed a significant  
314 fold-reduction in *mntH* expression in the WT T6+ cells, and these cells were defective in  $Mn^{2+}$ -  
315 uptake during oxidative stress (Figure 1D-F, S1D, and S1E). To check the impact of MntH on  
316 T6SS expression, we created  $\Delta mntH$  in *A. baumannii* and observed that deletion of *mntH*  
317 promotes a significant increase in T6SS expression under oxidative stress (Figure 2),  
318 indicating a negative impact of MntH expression on T6SS modulation in *A. baumannii* under  
319 oxidative stress which is quite interesting. Next, we focused our study on determining the  
320 mechanism behind the negative regulation.

321 Both *tetR1* and *tetR2* (present in pAB3) are involved in T6SS repression in *A.*  
322 *baumannii* ATCC 17978 cells (Weber et al., 2015) but the molecular mechanism is unclear.  
323 Since the WT T6- cells switch to WT T6+ cells upon losing pAB3 and WT T6+ cells are

324 sensitive to oxidative stress in our current study, we speculated that the sensitivity to oxidative  
325 stress might be due to losing pAB3. We show that pAB3 has no role in conferring resistance  
326 to oxidative stress (Figure S2C), indicating the existence of an alternate Mn<sup>2+</sup>-dependent T6SS  
327 regulation in *A. baumannii* under oxidative stress.

328         The sRNA-mediated post-transcriptional regulation of T6SS is well understood in *P.*  
329 *aeruginosa* (Brencic and Lory, 2009; Janssen et al., 2018; Marden et al., 2013; Romero et al.,  
330 2018). However, sRNA-mediated regulation of T6SS in *A. baumannii* is not explored yet. Since  
331 deletion of *mntH* showed a significant increase in T6SS expression in *A. baumannii* (Figure  
332 2), we hypothesized that this might be due to some Mn<sup>2+</sup>-dependent post-transcriptional  
333 repression which is effected upon the deletion of *mntH*. To examine this, we checked the  
334 expression of several sRNAs (Sharma et al., 2014) transcripts in WT T6<sup>-</sup>, WT T6<sup>+</sup>, and  $\Delta mntH$   
335 cells grown under oxidative stress supplemented with MnCl<sub>2</sub>. We observed that the expression  
336 of one sRNA, i.e., AbsR28, was significantly reduced in both WT T6<sup>+</sup> and  $\Delta mntH$  cells when  
337 compared with WT T6<sup>-</sup> cells (Figure 3A). This indicates AbsR28 might mediate the crosstalk  
338 between MntH and T6SS in *A. baumannii* during oxidative stress. To strengthen our  
339 hypothesis, we observed that the elevated level of AbsR28 represses the expression of T6SS  
340 in *A. baumannii* under oxidative stress supplemented with MnCl<sub>2</sub> by pulse expression studies  
341 (Figure 3D-F). Next, we focused our study on elucidating the mechanistic details of AbsR28  
342 mediated T6SS repression in *A. baumannii* under oxidative stress. We show that the binding  
343 of Mn<sup>2+</sup> to AbsR28 alters its native structure and results in a complementary base-pairing with  
344 *tssM* transcripts (Figure 3G, 3H, and 4B). TssM is one of the vital structural components of  
345 the T6SS membrane complex and essential for T6SS assembly (Brunet et al., 2015;  
346 Felisberto-Rodrigues et al., 2011; Ma et al., 2012; Stietz et al., 2020; VanRheenen et al.,  
347 2004). Next, we wanted to assess the impact of the cognate base-pairing on *tssM* transcripts  
348 in vivo. We observed that the stability of *tssM* transcripts was significantly reduced under  
349 AbsR28 expression in the presence of Mn<sup>2+</sup> (Figure 4E). In Gammaproteobacteria, RNase E  
350 is the primary catalyst of mRNA decay (Caron et al., 2010). sRNAs induce the decay of target

351 mRNA by RNase E-mediated mRNA degradation (Afonyushkin et al., 2005; Caron et al., 2010;  
352 Guillier and Gottesman, 2008; Morita et al., 2005; Prévost et al., 2011; Urban and Vogel, 2007;  
353 Vogel and Luisi, 2011). Since we observed AbsR28 expression-dependent decay of *tssM*  
354 transcripts in vivo, we hypothesized that AbsR28 triggers RNase E mediated processing of  
355 *tssM* transcripts. Our data demonstrate that AbsR28 potentiates RNase E-mediated  
356 degradation of *tssM* mRNA with the assistance of RNA chaperon Hfq (Figure 4F). The current  
357 study reveals how AbsR28 represses T6SS and plays a vital role in mediating the crosstalk  
358 between MntH and T6SS in *A. baumannii* under oxidative stress.

359 Deletion of *mntH* in *A. baumannii* strain results in impaired growth during calprotectin-  
360 mediated metal chelation and compromised survival in mice model of infection (Juttukonda et  
361 al., 2016). Based on our current observations, we speculated that this might be because of  
362 deletion of *mntH* that disrupts the uptake of  $Mn^{2+}$ , which is needed for AbsR28-mediated T6SS  
363 repression during oxidative stress. To test our hypothesis, we checked the impact of  $Mn^{2+}$ -  
364 dependent AbsR28 mediated regulation of T6SS in *A. baumannii* pathogenesis. All the three  
365 strains, i.e., WT T6+,  $\Delta mntH$ , and  $\Delta AbsR28$ , were compromised in survival under neutrophil-  
366 mediated oxidative stress and less virulent in the mice suggesting that  $Mn^{2+}$ -dependent  
367 AbsR28 mediated T6SS repression helps *A. baumannii* to survive in the host (Figure 5A-C).

368 The T6SS is often silent in the clinical isolates of *A. baumannii* (Meumann et al., 2019;  
369 Kim et al., 2017; Traglia et al., 2018; Wright et al., 2014). The reason behind the inactive T6SS  
370 in *A. baumannii* is still questionable. The following may cause inactive T6SS in *A. baumannii*  
371 clinical isolates: (i) high energy is required for T6SS expression, so to utilize the energy for  
372 some other cellular process, T6SS is silent; (ii) T6SS components are immunogenic (Mougous  
373 et al., 2006; Zheng et al., 2010) so it might be advantageous for *A. baumannii* T6SS inactive  
374 strains to evade from the host-mediated immune response (Lopez et al., 2020); (iii) *A.*  
375 *baumannii* cells switch from T6- to T6+ at the cost of losing antibiotic resistance encoded by  
376 the plasmid (Weber et al., 2015) so to maintain the resistance over competing with other  
377 bacteria it might prefer to inactivate the T6SS. We also tested the presence of both AbsR28

378 and *hcp* in other pathogenic isolates of *A. baumannii* strains (Figure S8A) and observed that  
379 T6SS is inactive in nine strains out of eleven strains tested under oxidative stress  
380 supplemented with  $MnCl_2$  (Figure S8B).

381 In summary, we show here the mechanistic details of AbsR28 sRNA-mediated T6SS  
382 repression in *A. baumannii* ATCC 17978 under oxidative stress (Figure 6). The sequential  
383 events of this pathway are as follows: (i) during oxidative stress, *A. baumannii* cells upregulate  
384 *mntH* to increase the uptake of  $Mn^{2+}$ ; (ii) Intracellular  $Mn^{2+}$  binds to AbsR28 and alters its native  
385 structure; (iii) the altered structure of AbsR28 helps in the complementary base pairing with  
386 *tssM* mRNA transcript and triggers RNase E processing; (iv) Degradation by RNase E  
387 decreases the abundance of *tssM* transcripts and thereby represses the T6SS expression. *A.*  
388 *baumannii* cells that lose this controlled regulation result in T6+ cells, unable to withstand  
389 oxidative stress and are cleared by the host. The findings presented here reveal an alternate  
390 detailed molecular mechanism of sRNA-mediated T6SS regulation in *A. baumannii* ATCC  
391 17978 apart from *tetR*-mediated regulation of T6SS (Weber et al., 2015). Our finding shows  
392 the crucial role of AbsR28 in regulating the molecular transition between T6- and T6+  
393 phenotypes in *A. baumannii*, which is essential to survive under oxidative stress and establish  
394 pathogenesis in the host.

## 395 **METHOD DETAILS**

### 396 **Bacterial strains and growth conditions**

397 Bacterial strains used in this study are listed in Table 2. *A. baumannii* strains were grown at  
398 37°C in an incubator in LB broth or LB agar. *E. coli* J53 strains were grown in LB broth or LB  
399 agar, supplemented with 100  $\mu$ g/mL sodium azide when necessary. *E. coli*-pNYL GFP strains  
400 were grown in LB broth or LB agar, supplemented with 50  $\mu$ g/mL kanamycin when necessary.  
401 *P. aeruginosa* PAO1 strains were grown in LB broth or LB agar. *A. baumannii* ATCC 17978  
402  $\Delta$ AbsR28-pWBAD30 and *A. baumannii* ATCC 17978  $\Delta$ AbsR28-pWBAD30AbsR28 strains  
403 were grown in LB broth or LB agar, supplemented with 50  $\mu$ g/mL kanamycin.

### 404 **Primary cell culture**

405 All experiments using human blood-derived neutrophils under protocol BT/IHEC-612020/7865  
406 were reviewed and approved by the Institute Human Ethics Committee (HEC) of the Indian  
407 Institute of Technology Roorkee. Blood samples were collected from healthy volunteers (Ages  
408 28-30) in vacutainer tubes (BD Vacutainer<sup>R</sup> K2E EDTA; REF367525). Neutrophils were  
409 isolated from the blood samples within 30 min of collection using Polymorphprep<sup>TM</sup>  
410 (ProteoGenix) according to the manufacturer's instructions. After isolation, the neutrophils  
411 were incubated on ice for 1 h in RPMI 1640 cell culture medium (RPMI + 10% (v/v) FBS),  
412 transferred into 12-well tissue culture plates (Thermo Fisher Scientific), and incubated in a cell  
413 culture incubator (Eppendorf) at 37°C (5% CO<sub>2</sub>) for 1 hour before experimentation.

#### 414 **Animal Models**

415 All animal experiments under protocol BT/IAEC/2018/07 were reviewed and approved by the  
416 Institute Animal Ethics Committee of the Indian Institute of Technology Roorkee. Procedures  
417 were performed according to the institutional policies. Adult (6–8 week old) age-matched male  
418 BALB/c (procured from Indian Institute of Science Education and Research Mohali, India) mice  
419 were housed in groups of eight and maintained at IIT Roorkee Animal Facilities.

#### 420 **Isolation of *A. baumannii* T6- and T6+ cells**

421 *A. baumannii* T6- and T6+ cells were isolated using Hcp-ELISA as described previously  
422 (Weber et al., 2013) with some modifications. Briefly, a fresh colony of wild-type *A. baumannii*  
423 ATCC 17978 streaked on LB-agar plate was used to inoculate in 5 mL LB-medium overnight  
424 (O/N) at 37°C in shaking. 0.1% inoculum from the O/N culture was then subcultured into fresh  
425 5 mL LB-medium and grown at 37°C in shaking to an OD<sub>600</sub> of 0.6 (mid-log phase). The culture  
426 was serially diluted in LB medium and plated on LB-agar followed by incubation at 37°C for  
427 O/N to obtain more than 100 isolated colonies. Individual colonies were inoculated in a 96-  
428 well plate containing 200 µL of LB medium/well and incubated at 37°C for O/N in gentle  
429 shaking. After O/N growth, the plate was centrifuged to pellet down the bacterial cells and 75  
430 µL of the supernatant from each well was transferred to a 96-well ELISA-plate (Thermo Fisher  
431 Scientific) containing 25 µL of binding buffer (0.0258 M sodium carbonate, 0.0742 M sodium



432 bicarbonate, pH 9.5) in each well (for example, A1 supernatant from 96-well plate was  
433 transferred to A1 of 96-well ELISA plate). The ELISA plate was incubated at 4°C for O/N on a  
434 gel rocker for efficient binding. The plate was then washed with 1X PBS and blocked with 200  
435  $\mu$ L of blocking solution (5% w/v skim milk in PBST; 1X PBS containing 0.1% inoculum v/v  
436 Tween-20) for 1 h at room temperature (RT). Primary anti-Hcp-antibody raised in the rabbit at  
437 a dilution of 1:10000 in blocking solution (2.5% w/v skim milk in PBST) was used at 100  $\mu$ L/well  
438 to probe at 4°C for O/N. Following three successive washes with PBST, HRP-conjugated goat  
439 anti-rabbit secondary antibody (Thermo Fisher Scientific) at a dilution of 1:20000 in a solution  
440 (1X PBS containing 0.1% inoculum v/v Tween-20) was added 100  $\mu$ L/well and incubated for  
441 1 h at RT in the dark. After three successive washes with PBST and one wash with PBS, 50  
442  $\mu$ L substrate (citrate phosphate buffer at pH 5.6 containing H<sub>2</sub>O<sub>2</sub> and o-Phenylenediamine  
443 dihydrochloride) was added to each well and waited for 10-15 min to develop yellow color.  
444 The reaction was stopped by adding 3N HCl, which will turn yellow to orange, and measured  
445 the OD at 495 nm. Purified His<sub>6</sub>-Hcp was used as a positive control and only LB medium as a  
446 negative control for the assay. A well that appears for the T6SS+ signal (i.e., develops orange  
447 color after ELISA) was marked and the cells from that particular well of the 96-well plate (the  
448 source of the supernatant sample) were isolated (considered at *A. baumannii* T6+ after 1<sup>st</sup>  
449 round of ELISA). Similarly, a well that appears for the T6SS- signal (i.e., does not develop any  
450 color after ELISA) was marked and the cells from that particular well of the 96-well plate (the  
451 source of the supernatant sample) were isolated (considered at *A. baumannii* T6- after 1<sup>st</sup>  
452 round of ELISA). Both the *A. baumannii* T6- and T6+ cells from 1<sup>st</sup> round ELISA were plated  
453 on LB agar and further Hcp-ELISA (2<sup>nd</sup> round) was performed using freshly isolated individual  
454 colonies to confirm the T6SS phenotype.

455 Further, *A. baumannii* T6+ cells were checked for Hcp secretion phenotype by Hcp-  
456 Western Blot. The *A. baumannii* T6- and T6+ cells from 2<sup>nd</sup> round ELISA were inoculated in  
457 LB medium and grew overnight (O/N) at 37°C in shaking. 0.1% inoculum from the O/N cultures  
458 was then subcultured into fresh 5 mL LB-medium individually and grown at 37°C in shaking to

459 an OD<sub>600</sub> of 0.6 (mid-log phase) for both the strains. Bacterial cells were harvested from 1 mL  
460 cultures and supernatants were collected. The supernatants were filtered through a 0.22 µm  
461 syringe filter (Merk Millipore Ltd.) and concentrated using trichloroacetic acid. The pellets were  
462 dissolved in 1X SDS-gel loading dye and heated at 95°C for 5 min. Whole-cell lysate (OD<sub>600</sub>  
463 normalized volume) and supernatants were run onto 15% SDS-PAGE for separation and  
464 transferred to a PVDF membrane (Cytiva). Followed by blocking (5% w/v skim milk in PBST;  
465 1X PBS containing 0.1% inoculum v/v Tween-20) for 1 h at RT, the membrane was probed by  
466 primary anti-Hcp-antibody raised in the rabbit at a dilution of 1:1000 in blocking solution (2.5%  
467 w/v skim milk in PBST) at 4°C for O/N on a gel rocker. Following five successive washes with  
468 PBST, HRP-conjugated goat anti-rabbit secondary antibody (Thermo Fisher Scientific) at a  
469 dilution of 1:20000 in a solution (1X PBS containing 0.1% inoculum v/v Tween-20) was added  
470 and incubated for 1 h at RT in the dark. After five successive washes with PBST and one wash  
471 with PBS, ECL substrate (TakaRa) was added and developed onto X-ray film.

#### 472 **Estimation of cell survival from phagocytosis**

473 Neutrophils were isolated from human blood as described above and diluted to obtain a final  
474 concentration of 1x10<sup>4</sup> cells/well. A fresh colony of WT T6- and WT T6+ strain streaked on  
475 LB-agar plates were used to inoculate in 5 mL LB-medium for O/N at 37°C in shaking. 0.1%  
476 inoculum from the O/N cultures were then subcultured into fresh 5 mL LB-medium and grown  
477 at 37°C in shaking to an OD<sub>600</sub> of 0.6 (mid-log phase). Bacterial cells were harvested and  
478 diluted to obtain 10<sup>4</sup> CFU/µL. The diluted bacterial cultures were then opsonized in fetal bovine  
479 serum (non-heat treated) for 15 minutes. Neutrophils were then co-incubated with bacterial  
480 strains at an MOI of 1:1 ratio in RPMI 1640 cell culture medium (HIMEDIA) and incubated at  
481 37°C in an animal tissue culture incubator (Eppendorf). The same method was performed for  
482 macrophage RAW 264.7 cell line in the DMEM medium (HIMEDIA). After 4 h of infection, the  
483 medium supernatants were serially diluted and plated onto Leeds *Acinetobacter* medium  
484 plates. After incubation at 37°C for O/N, the bacterial colonies were enumerated and the  
485 percent growth was quantified by dividing the CFU of the particular *A. baumannii* strain-

486 neutrophil/macrophage RAW 264.7 cell line co-culture by that respective strain alone culture  
487 (grown in the same condition in the absence of neutrophil/macrophage RAW 264.7 cell line).  
488 Only neutrophil/ macrophage RAW 264.7 cell line were kept as a negative control for the  
489 assay.

#### 490 **Growth assay under oxidative stress**

491 A fresh colony of each indicated strain streaked on LB-agar plates was used to inoculate in 5  
492 mL LB-medium for O/N at 37°C in shaking. 0.1% inoculum from the O/N cultures were then  
493 subcultured into fresh 5 mL LB-medium and grown at 37°C in shaking to an OD<sub>600</sub> of 0.6 (mid-  
494 log phase) for each strain. From the mid-log phase cultures, 0.1% inoculum was inoculated in  
495 a 200 µL fresh LB medium containing methyl viologen (MV) at 250 µM (final conc.). All the  
496 growth assays were performed in a sterile 96-well plate (Genaxy) at 37°C with shaking linearly  
497 at 180 CPM (6 mm) and the OD<sub>600</sub> as a measurement of growth was measured at every 30  
498 min interval for the indicated total time in the Synergy microplate reader (BioTek). Only media  
499 without any culture served as a negative control for this assay. The represented data are after  
500 background correction.

#### 501 **ROS quantification**

502 A fresh colony of WT T6- and WT T6+ strain streaked on LB-agar plates were used to inoculate  
503 in 5 mL LB-medium for O/N at 37°C in shaking. 0.1% inoculum from the O/N cultures were  
504 then subcultured into fresh 5 mL LB-medium and grown at 37°C in shaking to an OD<sub>600</sub> of 0.6  
505 (mid-log phase) for each strain. Bacterial cells were harvested by centrifugation and washed  
506 in sterile 1X PBS. The bacterial cell pellets were resuspended in 1X PBS and 2',7'-  
507 dichlorofluorescein diacetate (Thermo Fisher Scientific) was added at a final concentration of  
508 100 µM. After incubation for 30 min at 37°C, the cells were washed with 1X PBS to remove  
509 excess dye and transferred to 100 µL/well of a 96-well transparent bottom black well plate  
510 (BRAND). MV (250 µM final conc.) was added to the wells containing bacterial cells and  
511 incubated at 37°C with shaking linearly at 180 CPM (6 mm). OD<sub>600</sub> and fluorescence  
512 (excitation/emission at 485/535 nm) were measured at every 10 min interval for the indicated

513 total time in the Synergy microplate reader (BioTek). The represented data are after  
514 background correction and OD<sub>600</sub> normalization.

### 515 **Quantitative RT-PCR analysis**

516 Human blood-derived neutrophils were co-incubated with the bacterial strains as described in  
517 the above section. After 4 h incubation, the tissue culture plate was centrifuged at 400g for 5  
518 min to settle down the neutrophils. Sample supernatants containing the bacterial cells were  
519 collected and harvested the bacterial by centrifugation at maximum speed. After washing the  
520 cell pellet with 1X PBS, RNA was extracted from the bacterial cells by the classic phenol-  
521 chloroform method. Briefly, 1 mL RNAiso Plus reagent (TakaRa) was added to each bacterial  
522 cell pellet and mixed vigorously by pipetting. After incubation for 5 min at RT, 200 µL of  
523 chloroform was added to each sample, mixed using a vortex, and allowed to stand at RT for  
524 15 min for phase separation. The samples were then centrifuged at 12000g for 15 min at 4°C.  
525 After centrifugation, the upper aqueous layer of each sample was transferred to a fresh tube.  
526 RNA was precipitated by the addition of isopropyl alcohol at a 1:1 ratio, followed by incubation  
527 at RT for 10 min and centrifugation at 12000g for 10 min at 4°C. The supernatants were  
528 removed carefully and washed the pellet by adding 1 mL of ice-chilled 70% ethanol followed  
529 by centrifugation at 12000g for 5 min at 4°C. The supernatants were decanted carefully and  
530 air-dried the pellet. The extracted RNA was resuspended in 50 µL of pre-warmed RNase-free  
531 water. The DNA contaminations were removed by incubating the extracted RNA with DNase  
532 I (Thermo Scientific) according to the manufacturer's instructions, followed by heat  
533 inactivation. The efficiency of the DNase I treatment was confirmed by PCR using DNase I  
534 treated RNAs as a template. RNA concentrations were determined by Nanodrop (Eppendorf)  
535 and 2 µg of the total RNA for each sample was used for cDNA synthesis using PrimeScript  
536 1st strand cDNA Synthesis Kit (TakaRa) according to the manufacturer's instructions. The  
537 synthesized cDNA was diluted to 200 µL with RNase-free water and stored at -80°C till further  
538 use. The qRT-PCR was performed using 2X SYBR Green master mix (Thermo Fisher  
539 Scientific), primer pairs in Table 1, and cDNA as template, and after mixing well, the reactions

540 were transferred to a 96-well RT-PCR plate (BRAND). Amplifications were achieved using a  
541 3-step program on a QuantStudio 5 system (Thermo Fisher Scientific). Transcript abundance  
542 was calculated using the  $\Delta\Delta C_T$  method (Livak and Schmittgen, 2001) and normalized by the  
543 16s gene.

#### 544 **Quantification of intracellular metal content**

545 The concentration of metal content in bacterial cells was determined as described previously  
546 (Juttukonda et al., 2016) with some modifications. Briefly, a fresh colony of WT T6- and WT  
547 T6+ strain streaked on LB-agar plates were used to inoculate in 5 mL minimal medium (M9-  
548 medium) supplemented with 1% Casamino acids as a nutrient source for O/N at 37°C in  
549 shaking. 0.1% inoculum from the O/N cultures were then subcultured into fresh 100 mL M9-  
550 medium (supplemented with 1% Casamino acids) supplemented with or without  $MnCl_2$ ,  
551  $ZnSO_4$ , or  $FeCl_3$  at a final concentration of 100  $\mu M$  and grown at 37°C in shaking to an  $OD_{600}$   
552 of 0.6 (mid-log phase) for each strain. Then MV was added at a final concentration of 100  $\mu M$   
553 to the culture to induce oxidative stress and grown further at 37°C in shaking for 4 h. The  
554 bacterial cultures were then transferred to pre-weighed metal-free 50 mL centrifuge tubes and  
555 centrifuged to harvest by the cell pellet, washed thrice with Milli-Q deionized water, and dried  
556 thoroughly. The pellet weight was measured using an analytical balance (G&G). Pellets were  
557 digested with 1 mL 70%  $HNO_3$  by using Milli-Q deionized water as a diluent for O/N at 90°C  
558 and diluted with 9 mL of 3.5%  $HNO_3$  by using Milli-Q deionized water as diluent. The samples  
559 were then subjected to inductively coupled plasma-mass-spectrometry (8900 ICP-MS Triple  
560 Quad, Agilent) at Institute Instrumentation Centre (IIC) in IIT Roorkee. The concentrations  
561 were determined by utilizing a standard curve for each metal. Only M9-medium supplemented  
562 with 1% Casamino acids was used as a control.

#### 563 **Bacterial survival assay upon uptake of metal ions under oxidative stress**

564 A fresh colony of WT T6- and WT T6+ strain streaked on LB-agar plates were used to inoculate  
565 in 5 mL minimal medium (M9-medium) supplemented with 1% Casamino acids as a sole  
566 nutrient source for O/N at 37°C in shaking. 0.1% inoculum from the O/N cultures were then

567 subcultured into fresh 5 mL M9-medium (supplemented with 1% Casamino acids)  
568 supplemented with or without  $\text{MnCl}_2$ ,  $\text{ZnSO}_4$ ,  $\text{FeCl}_3$  or all together at a final concentration of  
569 250  $\mu\text{M}$  and grown at 37°C in shaking to an  $\text{OD}_{600}$  of 0.6 (mid-log phase) for each strain. Then  
570 MV was added at a final concentration of 250  $\mu\text{M}$  to the culture to induce oxidative stress and  
571 grown further at 37°C in shaking for 2 h. Cells were harvested from a 1 mL culture, washed  
572 with 1X PBS, and dissolved into 50  $\mu\text{L}$  of 1X PBS. For spot assay, after a serial dilution in 1X  
573 PBS, 5  $\mu\text{L}$  from each dilution was spotted onto LB agar containing MV at a final concentration  
574 of 100  $\mu\text{M}$  alone or with  $\text{MnCl}_2$ ,  $\text{ZnSO}_4$ , and  $\text{FeCl}_3$  (250  $\mu\text{M}$  each), incubated at 37°C for O/N,  
575 and images were taken by gel documentation system (Biorad). A similar assay was performed  
576 with  $\text{H}_2\text{O}_2$ ; in that case, the final concentration of  $\text{H}_2\text{O}_2$  was 500  $\mu\text{M}$ . For growth assay, 0.1%  
577 inoculum from the O/N cultures were then subcultured into fresh 5 mL M9-medium  
578 (supplemented with 1% Casamino acids) and grown at 37°C in shaking to an  $\text{OD}_{600}$  of 0.6  
579 (mid-log phase) for each strain. From the mid-log phase cultures, 0.1% inoculum was  
580 inoculated in 200  $\mu\text{L}$  fresh LB medium containing methyl viologen (final concentration of 150  
581  $\mu\text{M}$ ) supplemented with or without  $\text{MnCl}_2$ ,  $\text{ZnSO}_4$ , or  $\text{FeCl}_3$  at a final concentration of 250  $\mu\text{M}$ .  
582 All the growth assays were performed in a sterile 96-well plate (Genaxy) at 37°C with shaking  
583 linearly at 180 CPM (6 mm) and the  $\text{OD}_{600}$  as a measurement of growth was measured at  
584 every 30 min interval for the indicated total time in the Synergy microplate reader (BioTek).  
585 Only media without any culture served as a negative control for this assay. The represented  
586 data are after background correction.

### 587 **Generation of knock-out strains**

588 The deletion mutants were created using a homologous-recombination method described  
589 previously (Tucker et al., 2014) with some modifications. Briefly, a construct carrying  
590 apramycin cassette (amplified from pMDIAI and having FRT sites on both sides) flanking  
591 between 500 bp upstream and 500 bp downstream of the gene of interest was cloned into a  
592 pUC18 vector (used as a cloning vector). A PCR product was amplified from the construct  
593 using 125 bp upstream forward primer and 125 bp downstream reverse primer of the gene of

594 interest listed in Table 1. Around 5  $\mu\text{g}$  of the concentrated PCR gel-purified product was  
595 transformed into *A. baumannii* electrocompetent cells harboring pAT02 (contains Rec<sub>CAb</sub>  
596 system) under IPTG induction (2 mM) and plated on LB-agar containing apramycin (15  
597  $\mu\text{g}/\text{mL}$ ). The transformants were further passaged on LB-agar containing an increasing  
598 concentration of apramycin (15-30  $\mu\text{g}/\text{mL}$ ). The recombinants were further confirmed by PCR  
599 using primers located outside the regions of homology (i.e., 500 bp upstream forward primer  
600 and 500 bp downstream reverse primer of the gene of interest) listed in Table 1. Following  
601 PCR confirmation and curing of pAT02, clean knockout (K/O) was created by transforming  
602 pAT03 (contains FLP recombinase system) under IPTG induction (2 mM). A loss of apramycin  
603 resistance confirmed the clean K/O and the losing apramycin-FRT was further confirmed by  
604 PCR using apramycin forward and reverse primers listed in Table 1. After curing pAT03, the  
605 clean K/O strains were maintained in glycerol (15%) at  $-80^{\circ}\text{C}$  for further use.

#### 606 **Bacterial killing assay**

607 Bacterial killing assays were performed as described previously (Weber et al., 2015) with  
608 some modifications. Briefly, *A. baumannii* T6SS- and  $\Delta\text{mntH}$  strains were used as  
609 killer/predator and *E. coli* J53 (selection marker sodium azide; 100  $\mu\text{g}/\text{mL}$ ) or *E. coli*-pNYL  
610 GFP (selection marker kanamycin; 50  $\mu\text{g}/\text{mL}$ ) or *P. aeruginosa* (selectively grow on *P.*  
611 *aeruginosa* agar medium) were used as prey for this assay. Fresh colonies of both *A.*  
612 *baumannii* T6SS- and  $\Delta\text{mntH}$  strains streaked on LB-agar plates were used to inoculate in 5  
613 mL LB-medium for O/N at  $37^{\circ}\text{C}$  in shaking. 0.1% inoculum from the O/N cultures was then  
614 subcultured into fresh 5 mL LB-medium containing 100  $\mu\text{M}$  MV and  $\text{MnCl}_2$  and grown at  $37^{\circ}\text{C}$   
615 in shaking to an  $\text{OD}_{600}$  of 0.6 (mid-log phase). Cells were harvested from a 2 mL culture,  
616 washed with 1X PBS, and dissolved into 50  $\mu\text{L}$  of 1X PBS. Simultaneously, the prey cells were  
617 grown in LB medium containing respective selection markers to an  $\text{OD}_{600}$  of 0.6 (mid-log  
618 phase), harvested the cells from 2 mL culture, washed with 1X PBS, and dissolved into 50  $\mu\text{L}$   
619 of 1X PBS. The predator and prey cells were mixed at a ratio of 1:1 and spotted 100  $\mu\text{L}$  mixture  
620 on sterile 0.22  $\mu\text{m}$  syringe filters placed on dry LB agar plates. After being air-dried inside the  
621 hood, the plates were kept at  $37^{\circ}\text{C}$  for 4 h. The mixed cultures were scraped out and

622 resuspended in 1X PBS. For spot assay, after a serial dilution in 1X PBS, 5  $\mu$ L from each  
623 dilution was spotted onto LB agar containing sodium azide (100  $\mu$ g/mL) when *E. coli* J53 was  
624 used as prey or LB agar containing kanamycin (50  $\mu$ g/mL) when *E. coli*-pNYL GFP was used  
625 as prey. The plates were incubated at 37°C for O/N and images were taken using a camera.  
626 For CFU count, after a serial dilution in 1X PBS, 100  $\mu$ L from each dilution was spread onto  
627 LB agar containing sodium azide (100  $\mu$ g/mL) when *E. coli* J53 was used as prey or LB agar  
628 containing kanamycin (50  $\mu$ g/mL) when *E. coli*-pNYL GFP was used as prey or *P. aeruginosa*  
629 agar medium when *P. aeruginosa* was used as prey. The plates were incubated at 37°C for  
630 O/N and counted the number of colonies. The survival percentage of the prey cells was  
631 calculated considering the CFU of alone prey cells as 100%. To measure the prey cells' GFP  
632 fluorescence, both the predator and prey cells were mixed at a 1:1 ratio in LB-medium in a 96-  
633 well transparent bottom black well plate (BRAND). GFP fluorescence was recorded at 485/525  
634 nm to measure prey cells' growth at 37°C every 3 h.

### 635 **Western Blot analysis for Hcp**

636 A fresh colony of each indicated strain streaked on LB-agar plates was used to inoculate in 5  
637 mL LB-medium for O/N at 37°C in shaking. 0.1% inoculum from the O/N cultures were then  
638 subcultured into fresh 5 mL LB-medium containing MnCl<sub>2</sub> at a final concentration of 250  $\mu$ M  
639 and grown at 37°C in shaking to an OD<sub>600</sub> of 0.6 (mid-log phase) for each strain. MV was  
640 added to the culture at a final concentration of 250  $\mu$ M and incubated for another 2 h. Hcp  
641 secretion phenotype of the strains was performed by Hcp-Western Blot as described above.  
642 Primary anti-Hfq-antibody raised in rabbit at a dilution of 1:1000 was used as a control for cell  
643 lysate (CL).

### 644 **ELISA assay for HCP**

645 A fresh colony of each indicated strain streaked on LB-agar plates was used to inoculate in 5  
646 mL LB-medium for O/N at 37°C in shaking. 0.1% inoculum from the O/N cultures were then  
647 subcultured into fresh 5 mL LB-medium containing MnCl<sub>2</sub> at a final concentration of 250  $\mu$ M  
648 and grown at 37°C in shaking to an OD<sub>600</sub> of 0.6 (mid-log phase) for each strain. MV was



649 added to the culture at a final concentration of 250  $\mu$ M and incubated for another 2 h. The rest  
650 of procure for Hcp-ELISA was performed as mentioned above.

### 651 **RNA-sequencing data analysis**

652 RNA was isolated from WT T6- and  $\Delta$ AbsR28 cells grown in LB supplemented with MnCl<sub>2</sub>  
653 (250  $\mu$ M) to an OD<sub>600</sub> of 0.6 (mid-log phase), treated with MV (250  $\mu$ M) for 2 h, and purified as  
654 described above. RNA sequencing was performed by Biokart India Pvt. Ltd. (India) using the  
655 Illumina HiSeq 4000 platform (Illumina). RNA integrity was determined using RNA  
656 ScreenTape System (Agilent) and 4150 TapeStation System (Agilent). The RNA  
657 concentration was determined on Qubit 3.0 Fluorometer (ThermoFisher Scientific) using the  
658 Qubit RNA Assay Kit (ThermoFisher Scientific). rRNA was depleted using the QIAseq  
659 FastSelect–5S/16S/23S Kit (Qiagen) and cDNA libraries were prepared with KAPA RNA  
660 Hyaperprep kit KR1350 – v2.17 (Roche). Data quality was checked by Fastqc v0.11.8. Data  
661 trimming and adapter removal were performed by Trim Galore v 0.6.7. Analysis was performed  
662 by Rockhopper v 2.0.3. Comparative and statistical analyses were performed using iGeak  
663 v1.0a using the reference *A. baumannii* ATCC 17978 genome (NCBI: CP000521.1).

### 664 **Pulse expression studies**

665 An arabinose inducible vector pWBAD30 was modified from the pBAD30 backbone for this  
666 study. Briefly, the kanamycin cassette from the pKD4 plasmid was cloned into the PvuI site  
667 on the AmpR gene in pBAD30. The forward primer of the kanamycin cassette contained the  
668 XhoI site for cloning of *A. baumannii* compatible ori (named pW) into vector. After completion  
669 of two cloning, the sRNA was cloned at the EcoRI and HindIII sites present at the MCS of the  
670 plasmid, tightly controlled by arabinose inducible promoter. The pWBAD30-AbsR28 plasmid  
671 was transformed into  $\Delta$ AbsR28 electrocompetent cells and the transformants were selected  
672 on LB-agar plates containing kanamycin (50  $\mu$ g/mL).  $\Delta$ AbsR28 transformed with pWBAD30  
673 served as a vector control. For survival assay, fresh colonies of the indicated strains streaked  
674 on LB-agar plates containing kanamycin (50  $\mu$ g/mL) were used to inoculate in 5 mL LB-  
675 medium containing kanamycin (50  $\mu$ g/mL) or O/N at 37°C in shaking. 0.1% inoculum from the

676 O/N cultures was then subcultured into fresh 5 mL LB-medium with kanamycin (50 µg/mL)  
677 containing MnCl<sub>2</sub> at a final concentration of 250 µM and grown at 37°C in shaking to an OD<sub>600</sub>  
678 of 0.6 (mid-log phase). MV (250 µM final conc.) was added to the culture and grown for another  
679 2 h. Cells were harvested from a 2 mL culture, washed with 1X PBS, and dissolved into 50 µL  
680 of 1X PBS. Simultaneously, *E. coli* J53 as prey cells were grown in LB medium containing  
681 sodium azide (100 µg/mL) to an OD<sub>600</sub> of 0.6 (mid-log phase), harvested the cells from 2 mL  
682 culture, washed with 1X PBS, and dissolved into 50 µL of 1X PBS. The predator and prey  
683 cells were mixed at a ratio of 1:1, arabinose (0.2% v/v final concentration) was added for  
684 AbsR28 expression, and spotted the 100 µL mixture on sterile 0.22 µm syringe filters, placed  
685 on dry LB agar plates. After being air-dried inside the hood, the plates were kept at 37°C for 4  
686 h. The mixed cultures were scraped out and resuspended in 1X PBS. After a serial dilution in  
687 1X PBS, 100 µL from each dilution was spread onto LB agar containing sodium azide (100  
688 µg/mL). The plates were incubated at 37°C for O/N and counted the number of colonies. The  
689 survival percentage of the prey cells was calculated considering the CFU of alone prey cells  
690 as 100%. To check gene expression by qRT-PCR, the cells were grown in LB containing  
691 MnCl<sub>2</sub> at a final concentration of 250 µM and grown at 37°C in shaking to an OD<sub>600</sub> of 0.6 (mid-  
692 log phase). MV (250 µM final conc.) and arabinose (0.2% v/v final concentration) were added  
693 to the media and incubated for a further 4 h. RNA were extracted and qRT-PCR was performed  
694 as described above. For Hcp-Western Blot, the cells were grown in LB containing MnCl<sub>2</sub> at a  
695 final concentration of 250 µM and grown at 37°C in shaking to an OD<sub>600</sub> of 0.6 (mid-log phase).  
696 MV (250 µM final conc.) and arabinose (0.2% v/v final concentration) were added to the media  
697 and incubated for a further 4 h. Cell lysate (CL) and cell-free supernatant (S) were run in SDS-  
698 PAGE and performed Western Blot as mentioned above.

### 699 **Isothermal calorimetry**

700 All ITC titrations were performed using ITC-200 (GE Healthcare). After degassing, 600 µM  
701 MnCl<sub>2</sub> was placed into the syringe and 30 µM in vitro transcribed AbsR28 was placed in the  
702 reaction cell. ITC was performed over 20 injections, each 1.8 µl of MnCl<sub>2</sub> with an interval of

703 120 s allowed for equilibration of the mixture between injections at a constant stirring of 500  
704 rpm. All reactions were performed in buffer containing 10 mM Tris, 100 mM KCl, pH 8.0 at  
705 25°C. Using the Origin version 7.0 software thermogram provided with the system, data were  
706 fitted as a sequential binding model with binding constant ( $K$ ) after subtracting the control data.

### 707 **In vitro RNA transcription and 5'-end labeling**

708 In vitro transcription (IVT) was performed as described earlier (Desnoyers and Massé, 2012).  
709 Template DNA for IVT was obtained by using *A. baumannii* ATCC 17978 genomic DNA as a  
710 PCR template and forward primers containing the T7 promoter listed in Table 1. T7  
711 transcription was performed using the T7 RNA polymerase (Thermo Scientific) according to  
712 the manufacturer's instructions. DNA contaminations were removed by incubating the  
713 transcript RNA with DNase I (Thermo Scientific) according to the manufacturer's instructions,  
714 followed by heat inactivation. Complete transcripts were obtained by phenol-chloroform  
715 extraction, running long Urea-PAGE followed by gel purification and concentrated by sodium  
716 acetate precipitation. To perform 5'-end labeling, transcripts were dephosphorylated with  
717 FastAP (Thermo Scientific) and 5'-labeled with [<sup>32</sup>P]- $\gamma$ -ATP using T4 polynucleotide kinase  
718 (Thermo Scientific) with forward reaction buffer according to the manufacturer's protocol.  
719 Radiolabeled transcripts were purified by running long Urea-PAGE followed by gel purification  
720 and concentrated by sodium acetate precipitation.

### 721 **In vitro structural probing**

722 In vitro structural probing was performed as described earlier (Dambach et al., 2015) with  
723 some modifications. Briefly, in vitro transcribed 5'-labeled AbsR28 (2.5 pmol) were denatured  
724 for 2 min at 65°C, incubated on ice for 5 min, and RT for 5 min. AbsR28 was then incubated  
725 in a modified 2X in-line buffer (100 mM Tris-HCl pH 8.3, 200 mM KCl) at a range of MnCl<sub>2</sub>  
726 concentration containing yeast tRNA (1  $\mu$ g/reaction) for 40 h at room temperature. Afterward,  
727 2  $\mu$ L from 25 mM lead(II) acetate stock was added to each of the 10  $\mu$ L reactions and  
728 incubated for an exact 2 min at 37°C. RNaseT1 ladder was generated by incubating 5'-labeled  
729 AbsR28 with RNaseT1 (0.1 U/ $\mu$ L and 1.0 U/ $\mu$ L) in 1X sequencing buffer (Ambion) for 3 min at

730 55°C. Alkaline RNA ladders were generated by incubating 5'-labeled AbsR28 in 1X alkaline  
731 buffer (Ambion) for 5 min at 90°C. All reactions were stopped immediately by adding a stop  
732 buffer (Ambion). After phenol:chloroform:isoamyl alcohol purification, RNA pellets were  
733 dissolved in loading buffer II (Ambion). All samples were denatured for 3 min at 95°C and  
734 loaded on 10% PAGE/7 M urea sequencing gels at a constant 15 Watt. After gel drying for 2  
735 h at 80°C, bands were visualized using a phosphorimager (Typhoon FLA 7000, GE Healthcare)  
736 and ImageQuant software.

### 737 **Gel retardation assay**

738 Gel retardation assay was performed as described earlier (Matera et al., 2022) with some  
739 modifications. Briefly, unlabeled *tssM* in vitro transcript (250 nt upstream and 250 nt  
740 downstream from ATG) at a fixed concentration of 20 pmol and full-length AbsR28 in vitro  
741 transcript at an increasing concentration were used for gel retardation assay. *tssM* mRNA was  
742 denatured at 65°C for 2 min and chilled on ice for 5 min. 10X structure buffer (100 mM Tris-  
743 HCl pH 7.0 and 1 M KCl) was added at a final concentration of 1X to the mRNA and the mRNA  
744 was allowed to re-nature at 37°C for 15 min. Yeast RNA (Ambion) was added at a final  
745 concentration of 1 µg/reaction to the reaction mix and AbsR28 was added to the tubes at an  
746 increasing concentration. MnCl<sub>2</sub> was added to all the reaction mix at a final concentration of  
747 10 mM. After incubation at 37°C for 60 min, 6X RNA native loading buffer (Ambion) was added  
748 to stop the reaction and resolved on a 6% native PAGE at 4°C in 0.5% TBE at a constant  
749 current of 40 mA for 6 h. The gel was stained with SYBR Safe and visualized the RNA bands  
750 using a phosphorimager (Typhoon FLA 9000, GE Healthcare) and ImageQuant software.

### 751 **RNase E-mediated degradation assay**

752 The in vitro transcript *tssM* (250 nt upstream and 250 nt downstream from ATG) was 5'-labeled  
753 with [<sup>32</sup>P]-γ-ATP as described above. 5'-labeled *tssM* mRNA (5 pmol) was denatured at 65°C  
754 for 2 min and chilled on ice for 5 min. 10X structure buffer (100 mM Tris-HCl pH 7.0 and 1 M  
755 KCl) was added at a final concentration of 1X to the mRNA and the mRNA was allowed to re-  
756 nature at 37°C for 15 min. Yeast RNA (Ambion) was added to the reaction mix at a final

757 concentration of 1 µg/reaction. Unlabeled AbsR28 (35 pmol) and purified *A. baumannii* Hfq72,  
758 or *E. coli* Hfq protein (5 fold molar excess in hexamer over *tssM*), were added to the tubes.  
759 MnCl<sub>2</sub> was added to all the reaction mix at a final concentration of 10 mM. The reaction mixture  
760 was incubated at 37°C for 60 min. To initiate the RNase E-mediated degradation, purified  
761 RNase E (10 fold molar excess over *tssM*) was added to the reaction mixture and incubated  
762 further at 37°C for 210 min (0 min denoted the initial time point when RNase E was added).  
763 EDTA (2.5 µL from 50 mM stock) and Proteinase K (2.5 µL from 20 mg/mL stock) were added  
764 to each reaction mixture and incubated at 50°C for 10 min. Samples were purified immediately  
765 using 2X precipitation buffer supplied with RNase T1 kit (Ambion) according to the  
766 manufacturer's instruction. RNA pellets were dissolved in loading buffer II (Ambion) and  
767 denatured for 3 min at 95°C. RNA cleavage products were resolved on 6% native PAGE at a  
768 constant 15 Watt. After gel drying for 2 h at 80°C, bands were visualized using a  
769 phosphorimager (Typhoon FLA 9000, GE Healthcare) and ImageQuant software.

#### 770 **Mice infection model for *A. baumannii* pneumonia**

771 Mice (n = 8 for each group, determined using G\*Power analysis) were infected intranasally  
772 with *A. baumannii* and CFU was enumerated as previously described (Palmer et al., 2019)  
773 with some modification. Briefly, all the indicated strains were streaked freshly on LB-agar  
774 plates and incubated at 37°C in shaking for O/N. One fresh colony for each strain was used to  
775 inoculate in 5 mL LB-medium and grown at 37°C in shaking for O/N. The cultures were diluted  
776 to a 1:1000 ratio in fresh 10 mL LB-medium and 37°C in shaking till OD<sub>600</sub> 0.6 (mid-log phase).  
777 Bacterial cells were harvested by centrifugation at 6000g for 5 min at 4°C, washed with 1 mL  
778 ice-cold 1X sterile PBS, resuspended the pellet into ice-cold 1X sterile PBS, and maintained  
779 the inoculum on ice. The mice were anesthetized and infected intranasally with 20 µL of  
780 inoculum containing 4×10<sup>4</sup> CFU. Mice were euthanized at 36 h of infection, and lungs and  
781 livers were harvested, immediately transferred on ice, and washed with ice-cold 1X sterile  
782 PBS. The harvested organs were chopped into pieces to enumerate bacterial burden,  
783 histopathology, qRT-PCR, Western Blot, and ICP-MS analysis. For enumeration of bacterial

784 burden in the infected organs, the weight of the organs was measured using an analytical  
785 balance (G&G), homogenized using a tissue homogenizer, serially diluted into PBS, and  
786 plated onto Leeds *Acinetobacter* medium plates. After incubation at 37°C for O/N, the bacterial  
787 colonies were enumerated. For histopathology, harvested organs were fixed in a natural buffer  
788 solution containing formalin for fixation before embedding in paraffin blocks. Tissue sections  
789 were stained with hematoxylin and eosin, and slides were visualized under a microscope  
790 (Zeiss). For Western Blotting, the harvested tissue samples were homogenized in PBS  
791 containing protease inhibitor cocktail (Thermo Fisher Scientific). The protein concentration  
792 was determined by a BCA protein assay kit (TakaRa) using bovine serum albumin (BSA) as  
793 a standard. The Western Blotting was performed as described above and around 15 µg of the  
794 total protein was used for this.

#### 795 **QUANTIFICATION AND STATISTICAL ANALYSIS**

796 Statistical analyses were performed using GraphPad Prism 8. Each figure legend clearly  
797 defines the exact statistical tests, number of repeated experiments, significance values, and  
798 group sizes.

#### 799 **ACKNOWLEDGEMENTS**

800 We thank all the members of the Pathania Lab for their valuable suggestions and fruitful  
801 discussions regarding this manuscript. We are grateful to Prof. S.P. Mukherjee for the training  
802 required to handle [ $\gamma$ -<sup>32</sup>P]ATP at IIT Roorkee. We extend heartfelt thanks to Prof. N.K. Navani  
803 (IIT Roorkee) for his scientific inputs during experiments and critical views on the manuscript.  
804 We thank Dr. Jawed Akhter and Nishant Jyoti for their help during animal experiments. We  
805 are incredibly thankful to Arpita Dey for helping with the ITC assay and data analysis. We also  
806 thank Prof. P. Roy (IIT Roorkee) and members of his laboratory for animal cell lines. We are  
807 grateful to Institute Instrumentation Centre (IIC) in IIT Roorkee for providing facilities like ICP-  
808 MS and ITC. This work was funded by DBT/Wellcome Trust India Alliance Senior Fellowship  
809 (Ref. IA/S/21/1/505588) to R.P. S.B. was supported by a Research Fellow Award (Sr. No.

810 2061530396; Ref. No. 21/06/2015(i)EU-V) from University Grants Commission (UGC). A.P.  
811 was supported by a fellowship (Ref. No. 09/143(1019)/2020-EMR-I) from CSIR. K.D. was  
812 supported by a fellowship (Ref. No. DST/INSPIRE/03/2017/000008) from DST. The funders  
813 had no role in study design, data collection, interpretation, or the decision to submit the work  
814 for publication.

## 815 **AUTHORS CONTRIBUTIONS**

816 S.B. and R.P. designed the study, conceptualized the experiments, and interpreted data. S.B.  
817 performed the experiments and analysis. A.P. helped in gel retardation assay. K.D. purified  
818 proteins required for RNase E degradation assay. R.S. and T.K.S. provided the radioactive  
819 facility for lead acetate probing only, and S.C. helped in radio labeling AbsR28 for lead acetate  
820 probing at THSTI. R.P. engaged in funding acquisition. S.B. and R.P. wrote the manuscript,  
821 which all authors commented on.

## 822 **DECLARATION OF INTERESTS**

823 The authors declare no competing interests.

## 824 **REFERENCES**

- 825 1. Ahn, S., Jung, J., Jang, I.A., Madsen, E.L., and Park, W. (2016). Role of glyoxylate shunt in oxidative  
826 stress response. *Journal of Biological Chemistry* 291(22), pp.11928-11938.
- 827 2. Afonyushkin, T., Vecerek, B., Moll, I., Blasi, U., and Kaberdin, V.R. (2005). Both RNase E and  
828 RNase III control the stability of *sodB* mRNA upon translational inhibition by the small regulatory  
829 RNA RyhB. *Nucleic Acids Research* 33(5), pp.1678-1689.
- 830 3. Balasubramanian, D., and Vanderpool, C.K. (2013). New developments in post-transcriptional  
831 regulation of operons by small RNAs. *RNA Biology* 10(3), pp.337-341.
- 832 4. Basler, M. (2015). Type VI secretion system: secretion by a contractile nanomachine. *Philosophical  
833 Transactions of the Royal Society B: Biological Sciences* 370(1679), p.20150021.
- 834 5. Bergogne-Berezin, E., and Towner, K.J. (1996). *Acinetobacter* spp. as nosocomial pathogens:  
835 microbiological, clinical, and epidemiological features. *Clinical Microbiology Reviews* 9(2), pp.148-  
836 165.
- 837 6. Bernard, C.S., Brunet, Y.R., Gueguen, E., and Cascales, E. (2010). Nooks and crannies in type VI  
838 secretion regulation. *Journal of Bacteriology* 192(15), pp.3850-3860.
- 839 7. Brencic, A., and Lory, S. (2009). Determination of the regulon and identification of novel mRNA  
840 targets of *Pseudomonas aeruginosa* RsmA. *Molecular Microbiology* 72(3), pp.612-632.
- 841 8. Brunet, Y.R., Zoued, A., Boyer, F., Douzi, B., and Cascales, E. (2015). The type VI secretion  
842 TssEFGK-VgrG phage-like baseplate is recruited to the TssJLM membrane complex via multiple  
843 contacts and serves as assembly platform for tail tube/sheath polymerization. *PLoS Genetics* 11(10),  
844 p.e1005545.

- 845 9. Cao, Z., Casabona, M.G., Kneuper, H., Chalmers, J.D., and Palmer, T. (2016). The type VII secretion  
846 system of *Staphylococcus aureus* secretes a nuclease toxin that targets competitor bacteria. *Nature*  
847 *Microbiology* 2(1), pp.1-11.
- 848 10. Caron, M.P., Lafontaine, D.A., and Massé, E. (2010). Small RNA-mediated regulation at the level of  
849 transcript stability. *RNA Biology* 7(2), pp.140-144.
- 850 11. Cianfanelli, F.R., Monlezun, L., and Coulthurst, S.J. (2016). Aim, load, fire: the type VI secretion  
851 system, a bacterial nanoweapon. *Trends in Microbiology* 24(1), pp.51-62.
- 852 12. Coady, A., Xu, M., Phung, Q., Cheung, T.K., Bakalarski, C., Alexander, M.K., Lehar, S.M., Kim, J.,  
853 Park, S., Tan, M.W., and Nishiyama, M. (2015). The *Staphylococcus aureus* ABC-type manganese  
854 transporter MntABC is critical for reinitiation of bacterial replication following exposure to phagocytic  
855 oxidative burst. *PLoS One* 10(9), p.e0138350.
- 856 13. Dambach, M., Sandoval, M., Updegrave, T.B., Anantharaman, V., Aravind, L., Waters, L.S., and  
857 Storz, G. (2015). The ubiquitous yybP-ykoY riboswitch is a manganese-responsive regulatory  
858 element. *Molecular Cell* 57(6), pp.1099-1109.
- 859 14. Datsenko, K.A., and Wanner, B.L. (2000). One-step inactivation of chromosomal genes in  
860 *Escherichia coli* K-12 using PCR products. *Proceedings of the National Academy of Sciences* 97,  
861 6640–6645.
- 862 15. Desnoyers, G., and Massé, E. (2012). Noncanonical repression of translation initiation through small  
863 RNA recruitment of the RNA chaperone Hfq. *Genes & Development* 26(7), pp.726-739.
- 864 16. Dexter, C., Murray, G.L., Paulsen, I.T., and Peleg, A.Y. (2015). Community-acquired *Acinetobacter*  
865 *baumannii*: clinical characteristics, epidemiology and pathogenesis. *Expert Review of Anti-infective*  
866 *Therapy* 13(5), pp.567-573.
- 867 17. Falagas, M.E., Bliziotis, I.A., and Siempos, I.I. (2006). Attributable mortality of *Acinetobacter*  
868 *baumannii* infections in critically ill patients: a systematic review of matched cohort and case-control  
869 studies. *Critical Care* 10(2), pp.1-8.
- 870 18. Felisberto-Rodrigues, C., Durand, E., Aschtgen, M.S., Blangy, S., Ortiz-Lombardia, M., Douzi, B.,  
871 Cambillau, C., and Cascales, E. (2011). Towards a structural comprehension of bacterial type VI  
872 secretion systems: characterization of the TssJ-TssM complex of an *Escherichia coli* pathovar. *PLoS*  
873 *Pathogens* 7(11), p.e1002386.
- 874 19. Franze de Fernandez, M.T., Eoyang, L., and August, J.T. (1968). Factor fraction required for the  
875 synthesis of bacteriophage Q $\beta$ -RNA. *Nature* 219(5154), pp.588-590.
- 876 20. García-Bayona, L., Guo, M.S., and Laub, M.T. (2017). Contact-dependent killing by *Caulobacter*  
877 *crenscentus* via cell surface-associated, glycine zipper proteins. *Elife* 6, p.e24869.
- 878 21. Gripenland, J., Netterling, S., Loh, E., Tiensuu, T., Toledo-Arana, A., and Johansson, J. (2010).  
879 RNAs: regulators of bacterial virulence. *Nature Reviews Microbiology* 8(12), pp.857-866.
- 880 22. Guillier, M., and Gottesman, S. (2008). The 5' end of two redundant sRNAs is involved in the  
881 regulation of multiple targets, including their own regulator. *Nucleic Acids Research* 36(21), pp.6781-  
882 6794.
- 883 23. Hassan, H.M., and Fridovich, I. (1977). Regulation of the synthesis of superoxide dismutase in  
884 *Escherichia coli*. Induction by methyl viologen. *Journal of Biological Chemistry* 252(21), pp.7667-  
885 7672.
- 886 24. Holmqvist, E., and Wagner, E.G.H. (2017). Impact of bacterial sRNAs in stress responses.  
887 *Biochemical Society Transactions* 45(6), pp.1203-1212.
- 888 25. Hood, M.I., Mortensen, B.L., Moore, J.L., Zhang, Y., Kehl-Fie, T.E., Sugitani, N., Chazin, W.J.,  
889 Caprioli, R.M., and Skaar, E.P. (2012). Identification of an *Acinetobacter baumannii* zinc acquisition  
890 system that facilitates resistance to calprotectin-mediated zinc sequestration. *PLoS Pathogens*  
891 8(12), p.e1003068.
- 892 26. Hood, M.I., and Skaar, E.P. (2012). Nutritional immunity: transition metals at the pathogen–host  
893 interface. *Nature Reviews Microbiology* 10(8), pp.525-537.
- 894 27. Hong, Y., Zeng, J., Wang, X., Drlica, K., and Zhao, X. (2019). Post-stress bacterial cell death  
895 mediated by reactive oxygen species. *Proceedings of the National Academy of Sciences* 116(20),  
896 pp.10064-10071.
- 897 28. Janssen, K.H., Diaz, M.R., Golden, M., Graham, J.W., Sanders, W., Wolfgang, M.C., and Yahr, T.L.  
898 (2018). Functional analyses of the RsmY and RsmZ small noncoding regulatory RNAs in  
899 *Pseudomonas aeruginosa*. *Journal of Bacteriology* 200(11), pp.e00736-17.



- 900 29. Juttukonda, L.J., Chazin, W.J., and Skaar, E.P. (2016). *Acinetobacter baumannii* coordinates urea  
901 metabolism with metal import to resist host-mediated metal limitation. *mBio* 7(5), pp.e01475-16.
- 902 30. Juttukonda, L.J., and Skaar, E.P. (2015). Manganese homeostasis and utilization in pathogenic  
903 bacteria. *Molecular Microbiology* 97(2), pp.216-228.
- 904 31. Kaye, K.S., and Pogue, J.M. (2015). Infections caused by resistant gram-negative bacteria:  
905 epidemiology and management. *Pharmacotherapy: The Journal of Human Pharmacology and Drug*  
906 *Therapy* 35(10), pp.949-962.
- 907 32. Kehl-Fie, T.E., Chitayat, S., Hood, M.I., Damo, S., Restrepo, N., Garcia, C., Munro, K.A., Chazin,  
908 W.J., and Skaar, E.P. (2011). Nutrient metal sequestration by calprotectin inhibits bacterial  
909 superoxide defense, enhancing neutrophil killing of *Staphylococcus aureus*. *Cell Host & Microbe*  
910 10(2), pp.158-164.
- 911 33. Kehres, D.G., and Maguire, M.E. (2003). Emerging themes in manganese transport, biochemistry  
912 and pathogenesis in bacteria. *FEMS Microbiology Reviews* 27(2-3), pp.263-290.
- 913 34. Lin, J., Zhang, W., Cheng, J., Yang, X., Zhu, K., Wang, Y., Wei, G., Qian, P.Y., Luo, Z.Q., and Shen,  
914 X. (2017). A *Pseudomonas* T6SS effector recruits PQS-containing outer membrane vesicles for iron  
915 acquisition. *Nature Communications* 8(1), pp.1-12.
- 916 35. Livak, K.J., and Schmittgen, T.D. (2001). Analysis of relative gene expression data using real-time  
917 quantitative PCR and the  $2^{-\Delta\Delta CT}$  method. *Methods* 25, 402–408.
- 918 36. Lopez, J., Ly, P.M., and Feldman, M.F. (2020). The tip of the VgrG spike is essential to functional  
919 type VI secretion system assembly in *Acinetobacter baumannii*. *mBio* 11(1), pp.e02761-19.
- 920 37. Ma, L.S., Narberhaus, F., and Lai, E.M. (2012). IcmF family protein TssM exhibits ATPase activity  
921 and energizes type VI secretion. *Journal of Biological Chemistry* 287(19), pp.15610-15621.
- 922 38. Marden, J.N., Diaz, M.R., Walton, W.G., Gode, C.J., Betts, L., Urbanowski, M.L., Redinbo, M.R.,  
923 Yahr, T.L., and Wolfgang, M.C. (2013). An unusual CsrA family member operates in series with  
924 RsmA to amplify posttranscriptional responses in *Pseudomonas aeruginosa*. *Proceedings of the*  
925 *National Academy of Sciences* 110(37), pp.15055-15060.
- 926 39. Matera, G., Altuvia, Y., Gerovac, M., El Mouali, Y., Margalit, H., and Vogel, J. (2022). Global RNA  
927 interactome of *Salmonella* discovers a 5' UTR sponge for the MicF small RNA that connects  
928 membrane permeability to transport capacity. *Molecular Cell* 82(3), pp.629-644.
- 929 40. Meumann, E.M., Anstey, N.M., Currie, B.J., Piera, K.A., Kenyon, J.J., Hall, R.M., Davis, J.S., and  
930 Sarovich, D.S. (2019). Genomic epidemiology of severe community-onset *Acinetobacter baumannii*  
931 infection. *Microbial Genomics* 5(3).
- 932 41. Monteith, A.J., and Skaar, E.P. (2021). The impact of metal availability on immune function during  
933 infection. *Trends in Endocrinology & Metabolism* 32(11), pp.916-928.
- 934 42. Morita, T., Maki, K., and Aiba, H. (2005). RNase E-based ribonucleoprotein complexes: mechanical  
935 basis of mRNA destabilization mediated by bacterial noncoding RNAs. *Genes & Development*  
936 19(18), pp.2176-2186.
- 937 43. Mortensen, B.L., and Skaar, E.P. (2013). The contribution of nutrient metal acquisition and  
938 metabolism to *Acinetobacter baumannii* survival within the host. *Frontiers in Cellular and Infection*  
939 *Microbiology* 3, p.95.
- 940 44. Mougous, J.D., Cuff, M.E., Raunser, S., Shen, A., Zhou, M., Gifford, C.A., Goodman, A.L.,  
941 Joachimiak, G., Ordoñez, C.L., Lory, S., and Walz, T. (2006). A virulence locus of *Pseudomonas*  
942 *aeruginosa* encodes a protein secretion apparatus. *Science* 312(5779), pp.1526-1530.
- 943 45. Munoz-Price, L.S., Zembower, T., Penugonda, S., Schreckenberger, P., Lavin, M.A., Welbel, S.,  
944 Vais, D., Baig, M., Mohapatra, S., Quinn, J.P., and Weinstein, R.A. (2010). Clinical outcomes of  
945 carbapenem-resistant *Acinetobacter baumannii* bloodstream infections: study of a 2-state  
946 monoclonal outbreak. *Infection Control & Hospital Epidemiology* 31(10), pp.1057-1062.
- 947 46. Murdoch, C.C., and Skaar, E.P. (2022). Nutritional immunity: the battle for nutrient metals at the  
948 host–pathogen interface. *Nature Reviews Microbiology* pp.1-14.
- 949 47. Palmer, L. D., Green, E. R., Sheldon, J. R., and Skaar, E. P. (2019). Assessing *Acinetobacter*  
950 *baumannii* virulence and persistence in a murine model of lung infection. *Methods in Molecular*  
951 *Biology* 1946, 289-305.
- 952 48. Peleg, A.Y., Seifert, H., and Paterson, D.L. (2008). *Acinetobacter baumannii*: emergence of a  
953 successful pathogen. *Clinical Microbiology Reviews* 21(3), pp.538-582.
- 954 49. Porcheron, G., Garénaux, A., Proulx, J., Sabri, M., and Dozois, C.M. (2013). Iron, copper, zinc, and  
955 manganese transport and regulation in pathogenic *Enterobacteria*: correlations between strains, site

- 956 of infection and the relative importance of the different metal transport systems for virulence.  
957 *Frontiers in Cellular and Infection Microbiology* 3, p.90.
- 958 50. Prévost, K., Desnoyers, G., Jacques, J.F., Lavoie, F., and Massé, E. (2011). Small RNA-induced  
959 mRNA degradation achieved through both translation block and activated cleavage. *Genes &*  
960 *Development* 25(4), pp.385-396.
- 961 51. Price, I.R., Gaballa, A., Ding, F., Helmann, J.D., and Ke, A., (2015). Mn<sup>2+</sup>-sensing mechanisms of  
962 yybP-ykoY orphan riboswitches. *Molecular cell* 57(6), pp.1110-1123.
- 963 52. Repizo, G.D., Gagné, S., Foucault-Grunenwald, M.L., Borges, V., Charpentier, X., Limansky, A.S.,  
964 Gomes, J.P., Viale, A.M., and Salcedo, S.P. (2015). Differential role of the T6SS in *Acinetobacter*  
965 *baumannii* virulence. *PLoS One* 10(9), p.e0138265.
- 966 53. Romby, P., Vandenesch, F., and Wagner, E.G.H. (2006). The role of RNAs in the regulation of  
967 virulence-gene expression. *Current Opinion in Microbiology* 9(2), pp.229-236.
- 968 54. Romero, M., Silistre, H., Lovelock, L., Wright, V.J., Chan, K.G., Hong, K.W., Williams, P., Cámara,  
969 M., and Heeb, S. (2018). Genome-wide mapping of the RNA targets of the *Pseudomonas*  
970 *aeruginosa* riboregulatory protein RsmN. *Nucleic Acids Research* 46(13), pp.6823-6840.
- 971 55. Schieber, M., and Chandel, N.S. (2014). ROS function in redox signaling and oxidative stress.  
972 *Current Biology* 24(10), pp.R453-R462.
- 973 56. Schuppli, D., Georgijevic, J., and Weber, H. (2000). Synergism of mutations in bacteriophage Q $\beta$   
974 RNA affecting host factor dependence of Q $\beta$  replicase. *Journal of Molecular Biology* 295(2), pp.149-  
975 154.
- 976 57. Sharma, R., Arya, S., Patil, S.D., Sharma, A., Jain, P.K., Navani, N.K., and Pathania, R. (2014).  
977 Identification of novel regulatory small RNAs in *Acinetobacter baumannii*. *PLoS One* 9(4), p.e93833.
- 978 58. Si, M., Wang, Y., Zhang, B., Zhao, C., Kang, Y., Bai, H., Wei, D., Zhu, L., Zhang, L., Dong, T.G.,  
979 and Shen, X. (2017a). The type VI secretion system engages a redox-regulated dual-functional  
980 heme transporter for zinc acquisition. *Cell Reports* 20(4), pp.949-959.
- 981 59. Si, M., Zhao, C., Burkinshaw, B., Zhang, B., Wei, D., Wang, Y., Dong, T.G., and Shen, X. (2017b).  
982 Manganese scavenging and oxidative stress response mediated by type VI secretion system in  
983 *Burkholderia thailandensis*. *Proceedings of the National Academy of Sciences* 114(11), pp.E2233-  
984 E2242.
- 985 60. Silverman, J.M., Brunet, Y.R., Cascales, E., and Mougous, J.D. (2012). Structure and regulation of  
986 the type VI secretion system. *Annual Review of Microbiology* 66, p.453.
- 987 61. Souza, D.P., Oka, G.U., Alvarez-Martinez, C.E., Bisson-Filho, A.W., Dunger, G., Hobeika, L.,  
988 Cavalcante, N.S., Alegria, M.C., Barbosa, L.R., Salinas, R.K., and Guzzo, C.R. (2015). Bacterial  
989 killing via a type IV secretion system. *Nature Communications* 6(1), pp.1-9.
- 990 62. Stietz, M.S., Liang, X., Li, H., Zhang, X., and Dong, T.G. (2020). TssA–TssM–TagA interaction  
991 modulates type VI secretion system sheath-tube assembly in *Vibrio cholerae*. *Nature*  
992 *Communications* 11(1), pp.1-11.
- 993 63. Traglia, G., Chiem, K., Quinn, B., Fernandez, J.S., Montaña, S., Almuzara, M., Mussi, M.A.,  
994 Tolmasky, M.E., Iriarte, A., Centrón, D., and Ramírez, M.S. (2018). Genome sequence analysis of  
995 an extensively drug-resistant *Acinetobacter baumannii* indigo-pigmented strain depicts evidence of  
996 increase genome plasticity. *Scientific Reports* 8(1), pp.1-15.
- 997 64. Tucker, A.T., Nowicki, E.M., Boll, J.M., Knauf, G.A., Burdis, N.C., Trent, M.S., and Davies, B.W.  
998 (2014). Defining gene-phenotype relationships in *Acinetobacter baumannii* through one-step  
999 chromosomal gene inactivation. *mBio* 5(4), pp.e01313-14.
- 1000 65. Urban, J.H., and Vogel, J. (2007). Translational control and target recognition by *Escherichia coli*  
1001 small RNAs in vivo. *Nucleic Acids Research* 35(3), pp.1018-1037.
- 1002 66. VanRheenen, S.M., Duménil, G., and Isberg, R.R. (2004). IcmF and DotU are required for optimal  
1003 effector translocation and trafficking of the *Legionella pneumophila* vacuole. *Infection and Immunity*  
1004 72(10), pp.5972-5982.
- 1005 67. Vassallo, C.N., Cao, P., Conklin, A., Finkelstein, H., Hayes, C.S., and Wall, D. (2017). Infectious  
1006 polymorphic toxins delivered by outer membrane exchange discriminate kin in myxobacteria. *Elife*  
1007 6, p.e29397.
- 1008 68. Vogel, J., and Luisi, B.F. (2011). Hfq and its constellation of RNA. *Nature Reviews Microbiology* 9(8),  
1009 pp.578-589.

- 1010 69. Weber, B.S., Ly, P.M., Irwin, J.N., Pukatzki, S., and Feldman, M.F. (2015). A multidrug resistance  
1011 plasmid contains the molecular switch for type VI secretion in *Acinetobacter baumannii*. Proceedings  
1012 of the National Academy of Sciences 112(30), pp.9442-9447.
- 1013 70. Weber, B.S., Miyata, S.T., Iwashkiw, J.A., Mortensen, B.L., Skaar, E.P., Pukatzki, S., and Feldman,  
1014 M.F. (2013). Genomic and functional analysis of the type VI secretion system in *Acinetobacter*. PLoS  
1015 One 8(1), p.e55142.
- 1016 71. Weinberg, E.D. (1975). Nutritional immunity: host's attempt to withhold iron from microbial invaders.  
1017 *Jama* 231(1), pp.39-41.
- 1018 72. Wright, M.S., Haft, D.H., Harkins, D.M., Perez, F., Hujer, K.M., Bajaksouzian, S., Benard, M.F.,  
1019 Jacobs, M.R., Bonomo, R.A., and Adams, M.D. (2014). New insights into dissemination and variation  
1020 of the health care-associated pathogen *Acinetobacter baumannii* from genomic analysis. *mBio* 5(1),  
1021 pp.e00963-13.
- 1022 73. Zheng, J., Shin, O.S., Cameron, D.E., and Mekalanos, J.J. (2010). Quorum sensing and a global  
1023 regulator TsrA control expression of type VI secretion and virulence in *Vibrio cholerae*. Proceedings  
1024 of the National Academy of Sciences 107(49), pp.21128-21133.
- 1025 74. Zimble, D.L., Arivett, B.A., Beckett, A.C., Menke, S.M., and Actis, L.A. (2013). Functional features  
1026 of TonB energy transduction systems of *Acinetobacter baumannii*. *Infection and Immunity* 81(9),  
1027 pp.3382-3394.

1028

1029

1030

1031

1032

1033

1034

1035

1036

1037

1038

1039

1040

1041

1042 **MAIN FIGURE LEGENDS**

1043 **Figure 1. *A. baumannii* T6+ cells are defective in Mn<sup>2+</sup>-uptake and unable to cope with**  
1044 **oxidative stress.**

1045 (A) Bacterial strains were co-incubated with the phagocytic cell for 4 h at an MOI of 1:1. The  
1046 percentage of bacterial survival was enumerated by accounting for respective untreated  
1047 control (without phagocytic cell) as 100%. The data represents the mean of four independent  
1048 experiments each in biological triplicates ± SEM. See also Figure S1B.

1049 (B) Growth of the indicated strains in the presence or absence of MV (250 µM) in LB broth.  
1050 The data represents the mean of four biological replicates each in technical triplicates ± SD.

1051 (C) Bacterial intracellular ROS generation was determined by measuring the fluorescence of  
1052 2',7'-dichlorofluorescein (DCF). The data represents the mean of four biological replicates ±  
1053 SD.

1054 (D) Neutrophils were co-incubated with WT T6- and WT T6+ cells and the expression of *mntH*,  
1055 *znuB*, and *tonB* transcripts in the bacterial cells was determined by qRT-PCR. The data  
1056 represents the mean of three independent experiments each in technical triplicates ± SEM.

1057 (E) Intracellular <sup>55</sup>Mn was quantified by ICP-MS. The data represents the mean of three  
1058 biological replicates ± SD. See also Figure S1C.

1059 (F) Growth of the indicated strains in the presence of MV (150 µM) alone or supplemented  
1060 with either MnCl<sub>2</sub>, ZnSO<sub>4</sub>, or FeCl<sub>3</sub> in LB broth. The data represents the mean of three  
1061 biological replicates ± SD. See also Figure S1D and S1E.

1062 Statistical significance was determined using a multiple comparison two-way ANOVA test with  
1063 the Sidak correction for multiple comparisons comparing the means of each group to one  
1064 another (A & E) and Student's t-test (B, C, & D). \*\* denotes p-value <0.01, \*\*\* denotes p-value  
1065 <0.001, \*\*\*\* denotes p-value <0.0001, ns denotes not significant.

1066 **Figure 2. Deletion of *mntH* exhibited a significant increase in *hcp* expression under**  
1067 **oxidative stress.**

1068 (A) A schematic representation of T6SS (upper panel) and a schematic layout of the T6SS  
1069 gene cluster in *A. baumannii* ATCC 17978 (lower panel).

1070 (B) Transcription of *hcp* was determined by qRT-PCR. The data represents the mean of three  
1071 independent experiments each in technical triplicates  $\pm$  SEM. Statistical significance was  
1072 determined using Student's t-test. \* denotes p-value  $<0.05$ .

1073 (C) The Hcp secretion profile of the indicated strains was confirmed by Western blot of cell  
1074 lysate (CL) and culture supernatants (S). Purified His<sub>6</sub>-Hcp was used as a positive control. Hfq  
1075 was used as a loading control for CL. The data represents three independent experiments  
1076 where the samples were run on one gel. See also Figure S3A.

1077 (D) T6SS competition assay in which prey cells were subjected to killing by incubation with  
1078 WT T6-, WT T6+,  $\Delta mntH$ , and  $\Delta tssM$  strains. The survival percentage of prey cells was  
1079 enumerated by accounting respective untreated control (without predator/killer cells) as 100%.  
1080 The data represents the mean of three biological replicates  $\pm$  SD. Statistical significance was  
1081 determined using two-way ANOVA with Tukey's multiple comparison test for each sample with  
1082 the same prey killed by the killer strains. \*\*\*\* denotes p-value  $<0.0001$ .

1083 (E) Recovery of surviving prey cells after co-incubation with WT T6- or  $\Delta mntH$ .

1084 (F) GFP fluorescence of *E. coli*-pNYL GFP was measured after co-incubation with WT T6- or  
1085  $\Delta mntH$  at the indicated time points. The data represents the mean of six biological replicates  
1086  $\pm$  SEM.

1087 (G) Detection of Hcp secretion from individual colonies of WT T6-, and  $\Delta mntH$  strains by Hcp-  
1088 ELISA. \* indicates wells with purified His<sub>6</sub>-Hcp, used as a positive control for Hcp-ELISA. See  
1089 also Figure S3B.

1090 **Figure 3. AbsR28 represses the T6SS in *A. baumannii* under oxidative stress, and Mn<sup>2+</sup>**  
1091 **is required for this regulation.**

1092 (A) The expression of several sRNAs and *hfq* was examined by qRT-PCR. The data  
1093 represents the mean of three independent experiments each in technical triplicates ± SEM.

1094 (B) RNA-seq analysis comparing RNA from MV and MnCl<sub>2</sub> (250 μM) treated ΔAbsR28 to a  
1095 WT T6- control. A dotted black line denotes p <0.05.

1096 (C) Transcription of each T6SS structural gene in WT T6- and ΔAbsR28 cells was determined  
1097 by qRT-PCR. The data represents the mean of three independent experiments, each in  
1098 technical triplicates ± SEM.

1099 (D) Transcription of *hcp* was determined by qRT-PCR. The data represents the mean of three  
1100 independent experiments each in technical triplicates ± SEM.

1101 (E) The Hcp secretion profile of the bacterial strains was tested by Western blot of cell lysate  
1102 (CL). The data represents two independent experiments where the samples were run on one  
1103 gel. See also Figure S5A.

1104 (F) T6SS competition assay in which *E. coli* J53 prey cells were subjected to killing by  
1105 ΔAbsR28-pWBAD30AbsR28 and ΔAbsR28-pWBAD30 strains. The data represents the mean  
1106 of three biological replicates ± SD.

1107 (G) Isothermal titration calorimetry (ITC) of Mn<sup>2+</sup> to AbsR28. See also Figure S5B.

1108 (H) Lead acetate probing of the 5'end-labeled [ $\gamma$ -<sup>32</sup>P]ATP AbsR28 in increasing concentration  
1109 of MnCl<sub>2</sub> provided in structure buffer. Lanes indicated as T1 and OH ladders were obtained  
1110 from the same labeled AbsR28 after incubation with RNase T1 and hydroxyl anions,  
1111 respectively. RNase T1 digestion was performed in duplicates at both 0.1 and 1.0 U  
1112 concentrations. The position of cleaved G residues is marked at the left of the gel. See also  
1113 Figure S5C.

1114 (I) Secondary structure of *A. baumannii* AbsR28 sRNA predicted by Rfam software.

1115 Statistical significance was determined using the multiple comparison two-way ANOVA test  
1116 with the Sidak correction for multiple comparisons comparing the means of each group to one  
1117 another (A, D, & F) and Student's t-test (C). \* denotes p-value <0.05, \*\* denotes p-value <0.01,  
1118 \*\*\* denotes p-value <0.001, \*\*\*\* denotes <0.0001, ns denotes not significant.

1119 **Figure 4. Mn<sup>2+</sup> is required for AbsR28 to base-pair with *tssM* mRNA and repress the**  
1120 **T6SS by potentiating RNase E mediated degradation of *tssM* mRNA.**

1121 (A) Predicted base-pairing between *tssM* and AbsR28 by the CopraRNA bioinformatics tool.

1122 (B-C) Gel retardation assay of unlabeled *tssM* in vitro transcript and unlabeled full-length  
1123 AbsR28 in vitro transcript in structure buffer containing either MnCl<sub>2</sub> or MgCl<sub>2</sub>. See also Figure  
1124 S6A and S6B.

1125 (D) Quantification of unbound *tssM* obtained from Figures C and D are shown (n = 2  
1126 independent experiments) using ImageJ software.

1127 (E) Transcription of *tssM* was determined after adding Rifampicin (400 µg/mL) by qRT-PCR  
1128 and plotted as the fold change relative to 0 min for each sample. The data represents the  
1129 mean of technical triplicates ± SD. Statistical significance was determined using the one-way  
1130 ANOVA test with Dunnett's multiple comparison test. \*\*\*\* denotes p-value <0.0001, ns  
1131 denotes not significant.

1132 (F) Cleavage of the 5'-end-labeled [ $\gamma$ -<sup>32</sup>P]ATP *tssM* in vitro transcript was assessed by  
1133 incubating with RNase E in the presence or absence of unlabeled AbsR28 and/or *A.*  
1134 *baumannii* Hfq72 or *E. coli* Hfq protein for 0 and 3.3 hours. The complete 5'-labeled *tssM*  
1135 transcripts that remain after RNase E mediated cleavage are denoted by a filled triangle.

1136 **Figure 5. Mn<sup>2+</sup>-dependent AbsR28 mediated T6SS repression is required for *A.***  
1137 ***baumannii* pathogenesis.**

1138 (A) Bacterial strains were co-incubated with neutrophils for 4 h at an MOI of 1:1. Percentage  
1139 of bacterial survival was enumerated, accounting for respective untreated control (without

1140 neutrophil) as 100%. The data represents the mean of three independent experiments each  
1141 in biological triplicates  $\pm$  SEM.

1142 (B) Enumeration of bacterial burden recovered from mice lungs and liver ( $n = 8$ ) infected with  
1143 WT T6-, WT T6+,  $\Delta mntH$ , or  $\Delta AbsR28$  strains at 36 hpi. Data represents mean  $\pm$  SD.

1144 (C) Histopathology of the mice lungs (H&E stained) infected with WT T6-, WT T6+,  $\Delta mntH$ , or  
1145  $\Delta AbsR28$  strains at 36 hpi. Tissue infiltration is indicated by necrosis (arrowheads) and  
1146 alveolar inflammation (asterisks). The scale bar is 100  $\mu$ M.

1147 Statistical significance was determined using the one-way ANOVA test with Tukey's multiple  
1148 comparisons (A & B). \* denotes  $p$ -value  $<0.05$ , \*\*\* denotes  $p$ -value  $<0.001$ , ns denotes not  
1149 significant.

1150 **Figure 6. Proposed model of AbsR28-mediated post-transcriptional repression of T6SS**  
1151 **in *A. baumannii* during oxidative stress.**

1152 During oxidative stress, *A. baumannii* cells utilize MntH to increase uptake of  $Mn^{2+}$ . An  
1153 elevated level of  $Mn^{2+}$  binds and alters the native structure of AbsR28 sRNA, which results in  
1154 AbsR28-*tssM* mRNA complementary base-pairing. The consequence of the AbsR28-*tssM*  
1155 mRNA complex formation is the degradation of *tssM* by RNase E and causes repression of  
1156 T6SS.

1157

1158

1159

1160

1161

1162

1163



1164 MAIN FIGURES

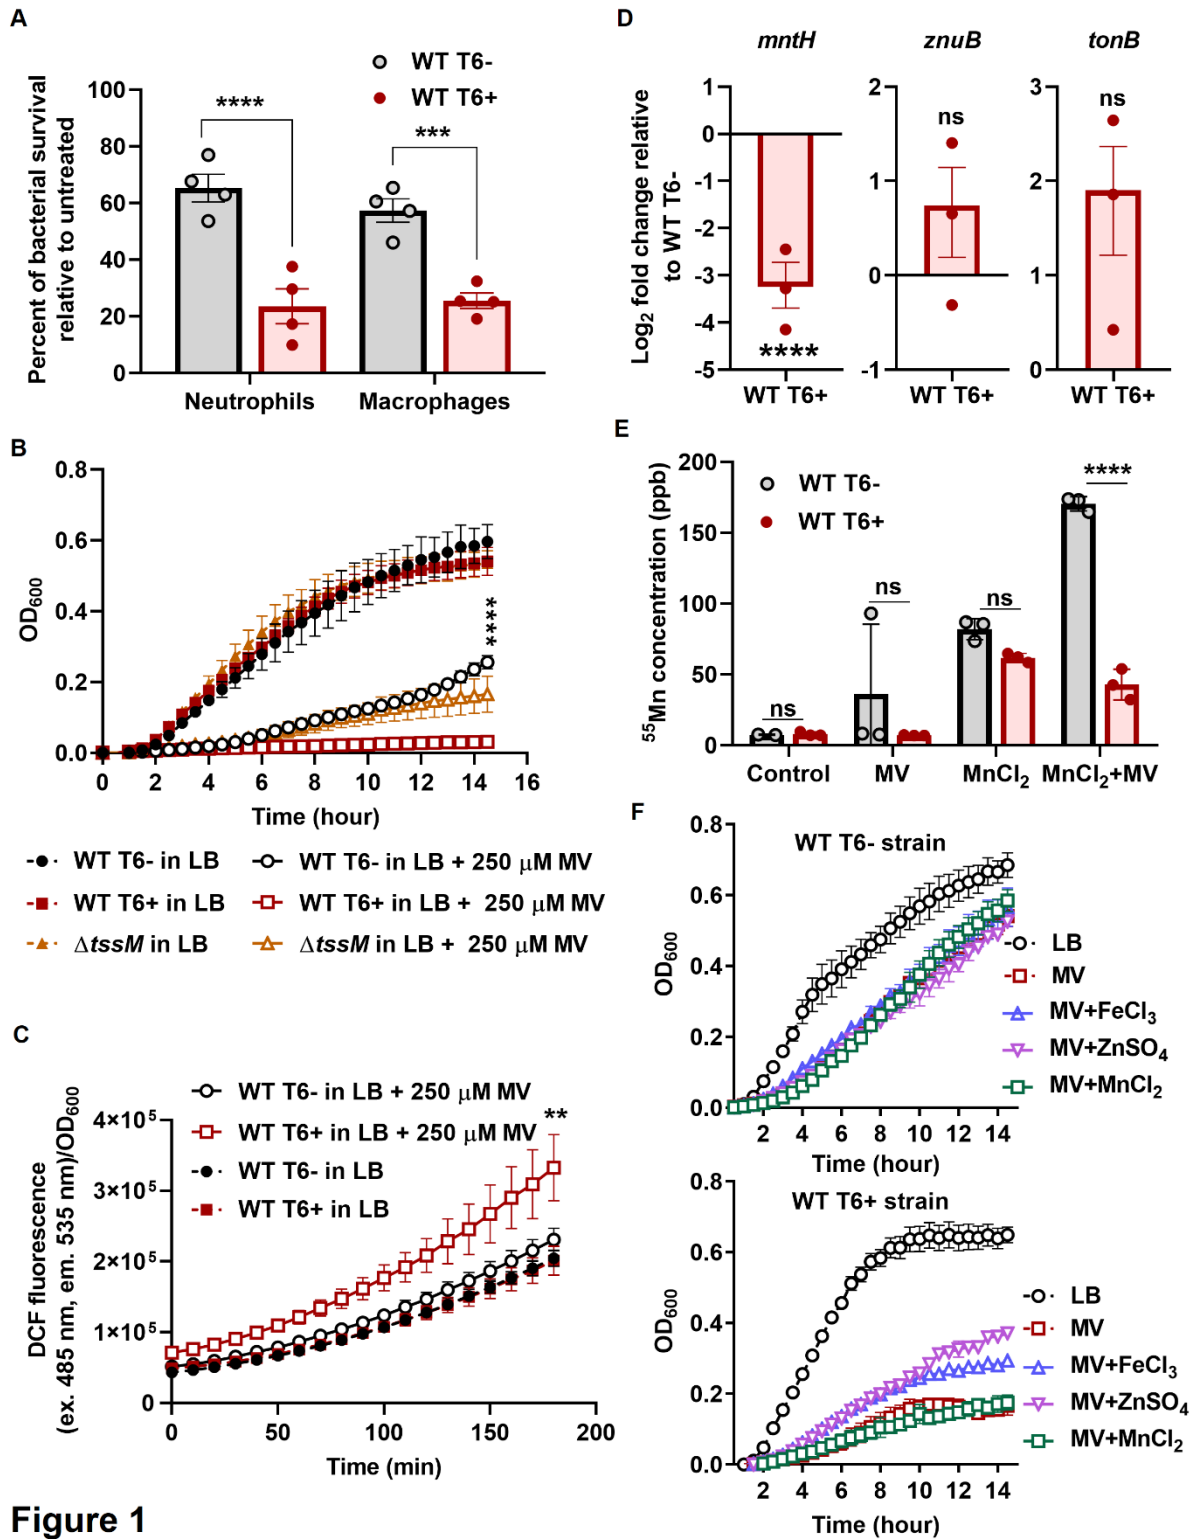

Figure 1

1165

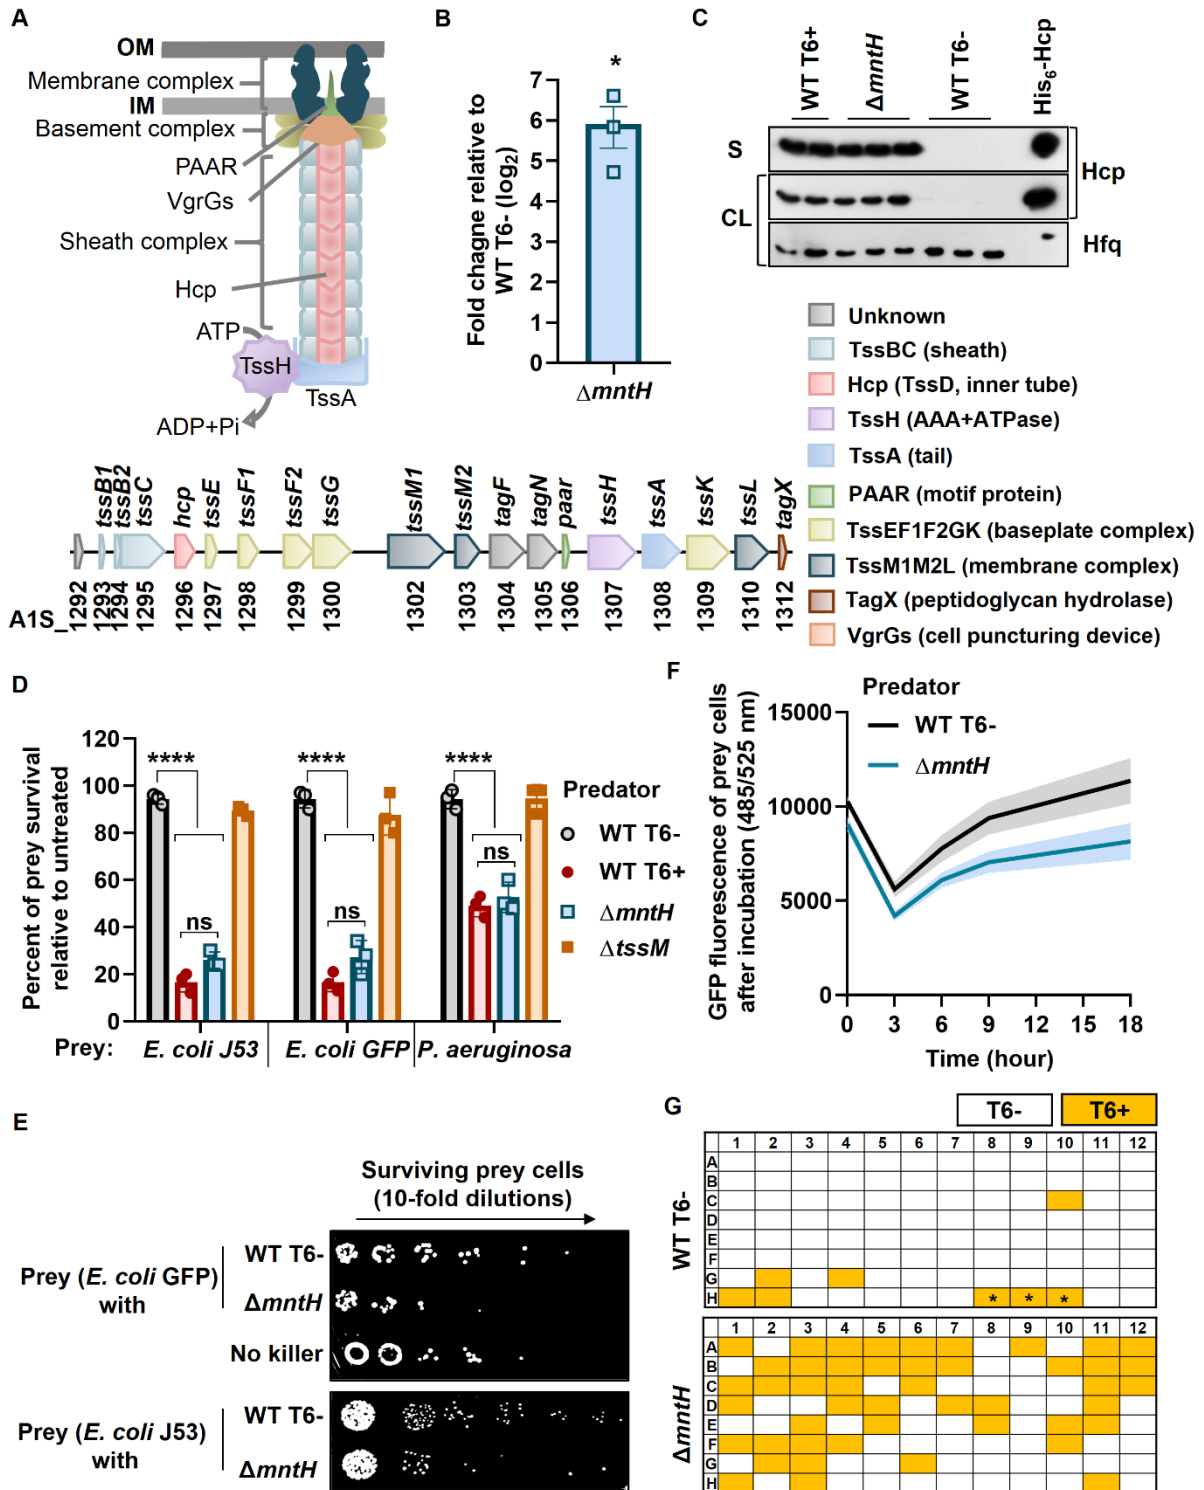

**Figure 2**

1166

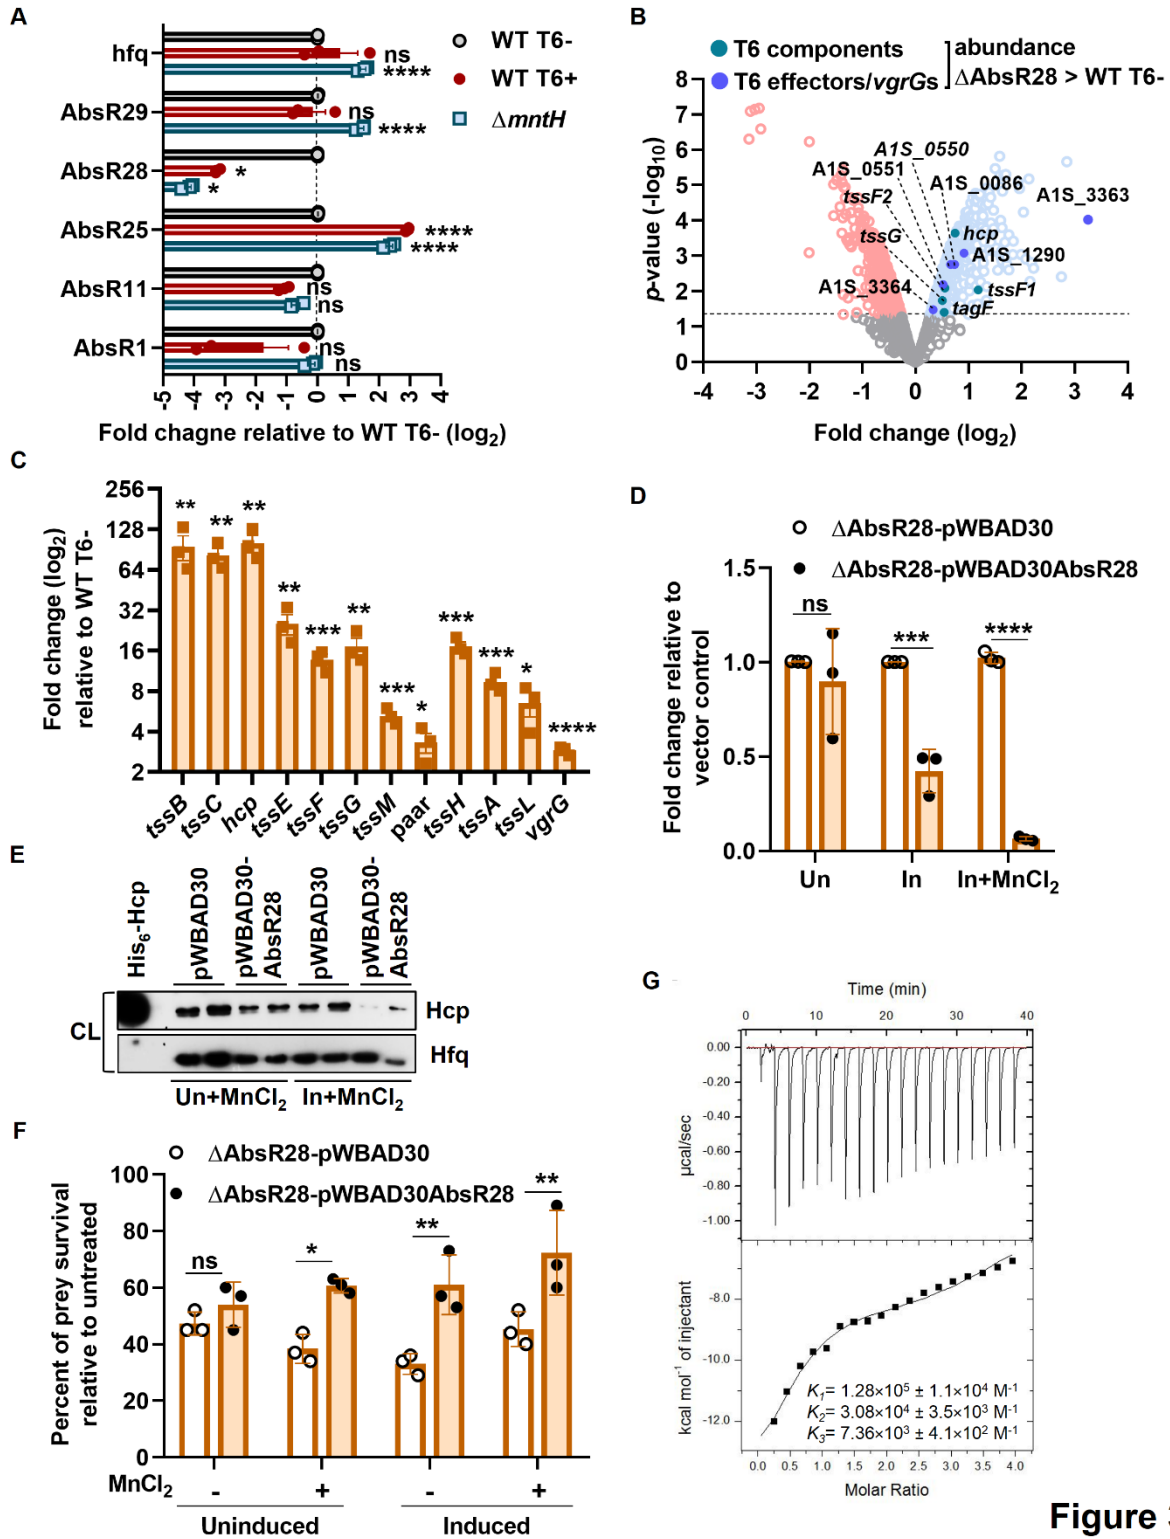

Figure 3

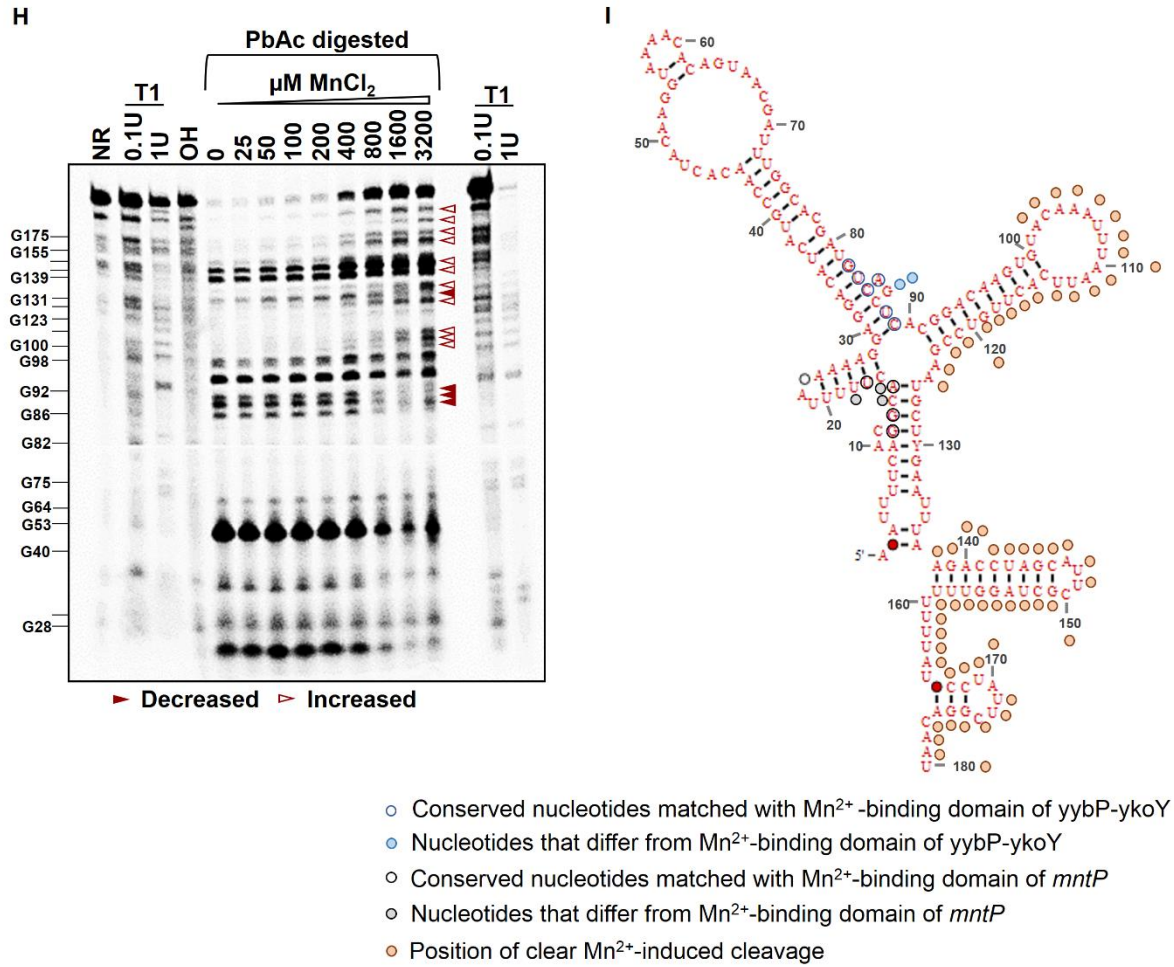

1168

**Figure 3**

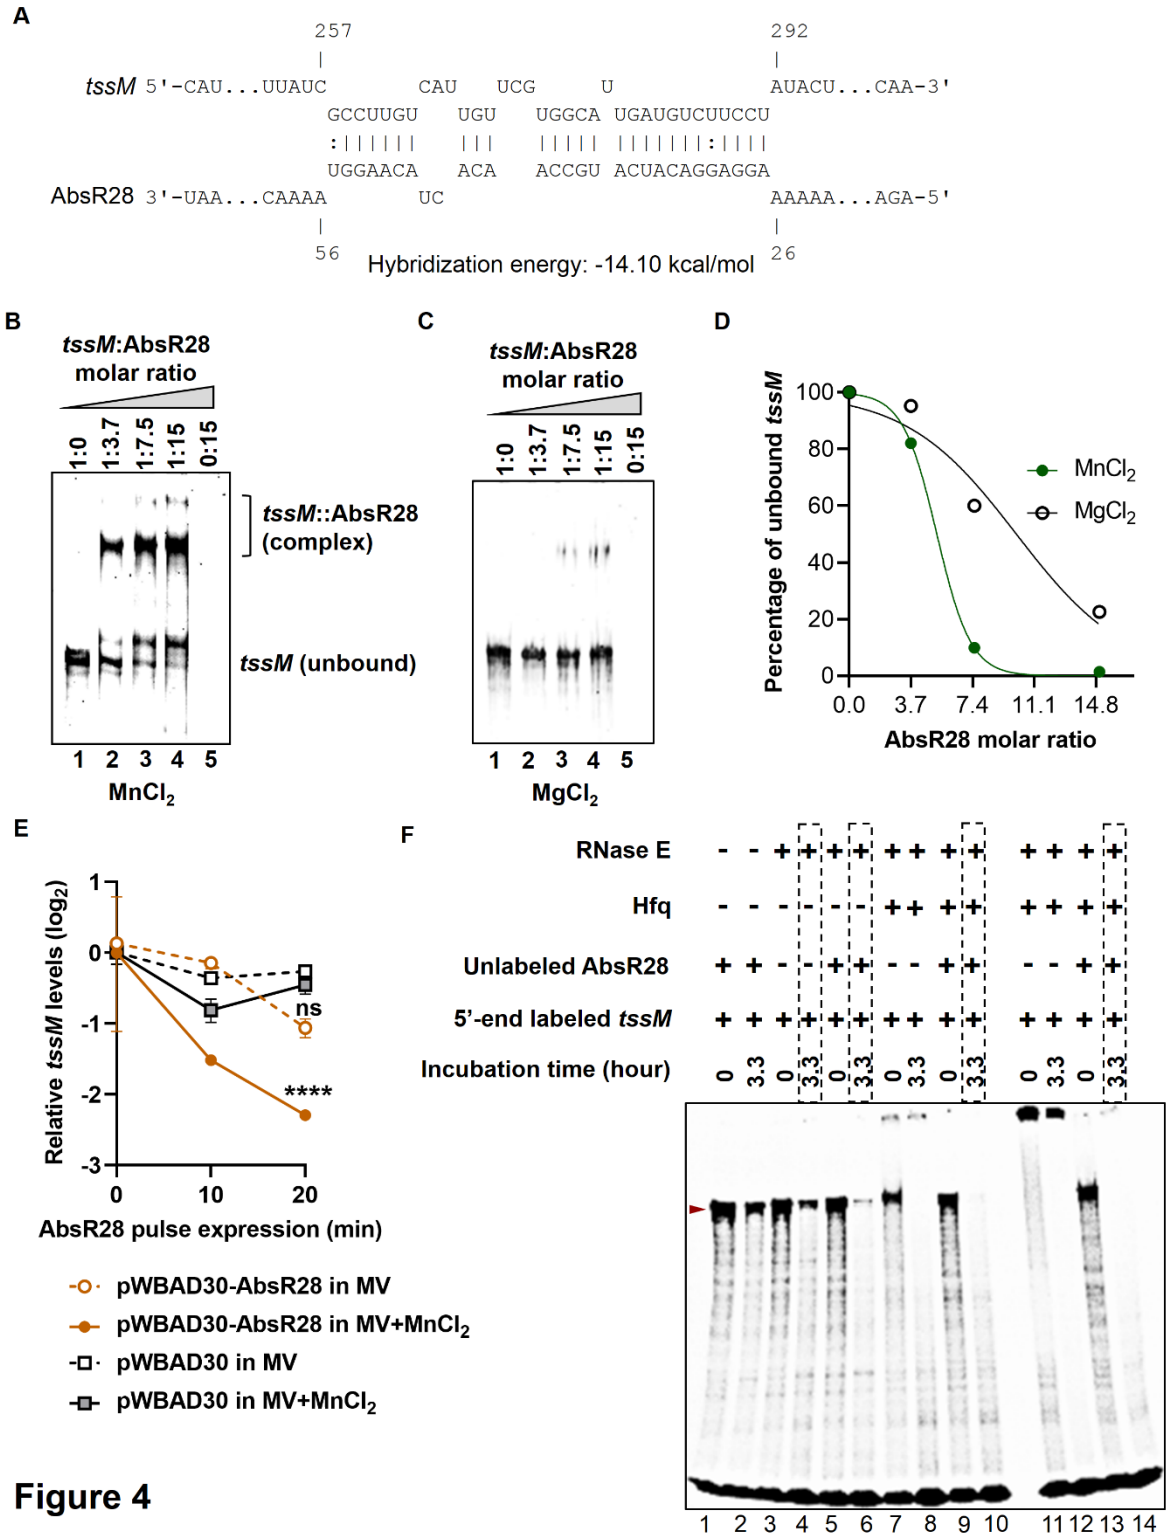

Figure 4

1169

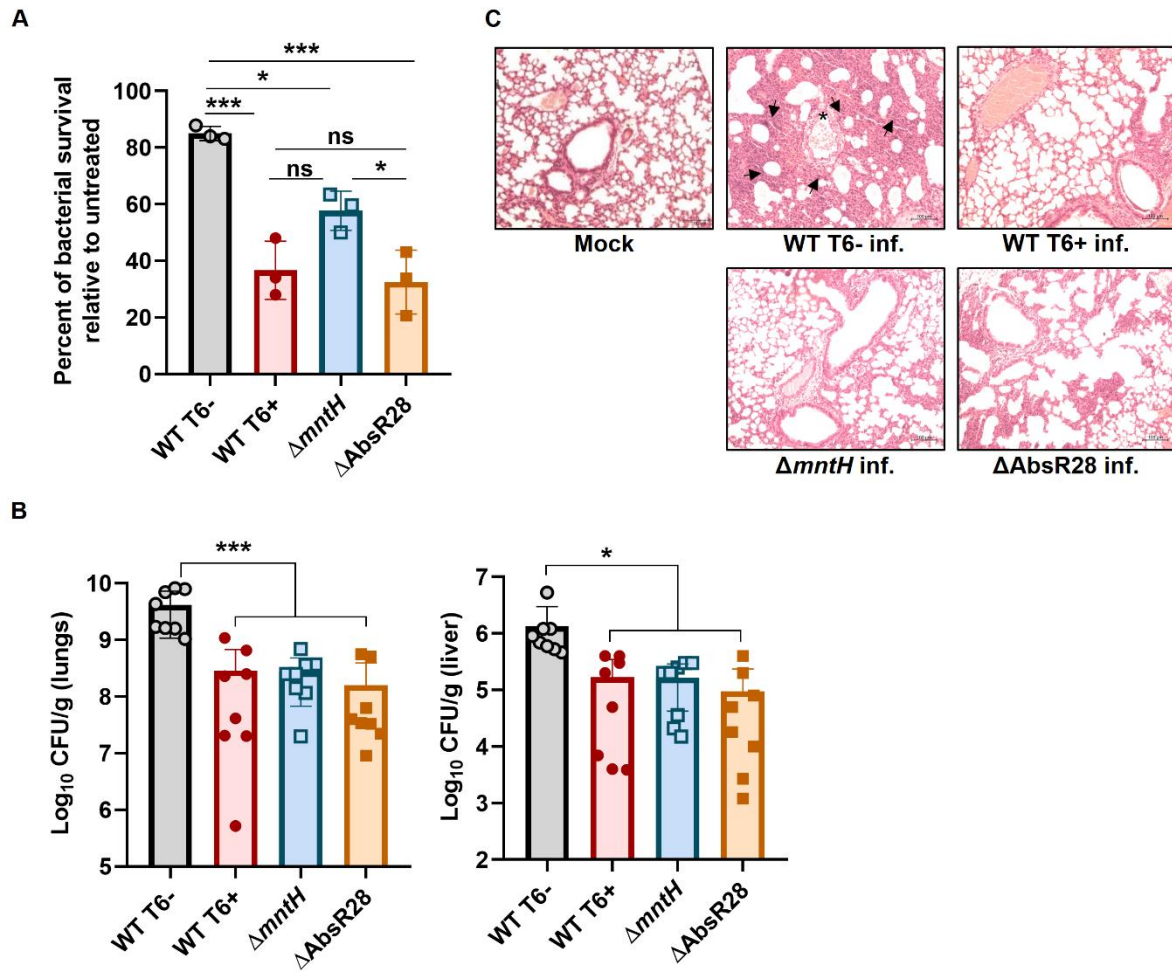

1170 **Figure 5**

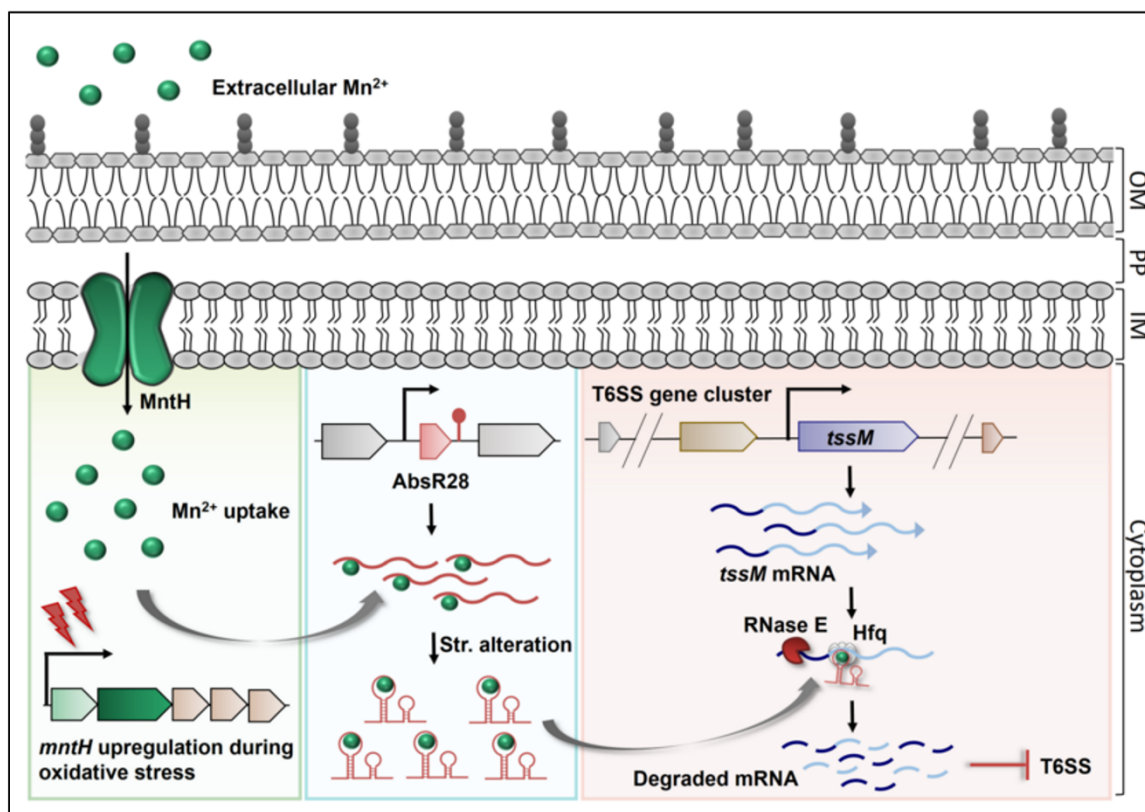

1171 **Figure 6**

1172

1173

1174

1175 **SUPPLEMENTARY FIGURE LEGENDS**

1176 **Figure S1: *A. baumannii* T6+ cells are sensitive to oxidative stress due to inadequate**

1177 **Mn<sup>2+</sup>-uptake. Related to Figure 1. (A)** Hcp secretion profiles of the isolated WT T6- and WT

1178 T6+ strains were confirmed by Western blot. Purified His<sub>6</sub>-Hcp was used as a positive control

1179 for Western Blot. **(B)** *A. baumannii* ATCC 17978 wild-type T6SS- (WT T6-) and wild-type

1180 T6SS+ (WT T6+) strains were co-incubated with human blood-derived neutrophils for 4 h at

1181 an MOI of 1:1. The cells were washed after incubation with gentamycin (300 µg/mL) for 2 h

1182 and neutrophils were lysed using 0.04% Triton X-100. Cell lysates were serially diluted and

1183 spotted onto LB agar plates. The untreated bacterial cells (without neutrophils) were also

1184 spotted on LB agar plates. After incubation at 37°C overnight (O/N), the images were captured

1185 using a gel documentation system (Biorad). **(C)** Intracellular <sup>66</sup>Zn and <sup>56</sup>Fe were quantified by

1186 ICP-MS. WT T6- and WT T6+ cells were grown in minimal media (M9-media) containing

1187 Casamino acid as a nutrient source supplemented with methyl viologen (MV) and either ZnSO<sub>4</sub>

1188 or FeCl<sub>3</sub> (at a final concentration of 100 µM), and the intracellular Zn<sup>2+</sup> and Fe<sup>2+/3+</sup>

1189 concentrations were measured in cell pellets by ICP-MS. The data represent three biological

1190 replicates with a standard deviation (SD) of the mean. Statistical significance was determined

1191 using the multiple comparison two-way ANOVA test with the Sidak correction for multiple

1192 comparisons comparing the means of each group to one another. ns denotes not significant.

1193 **(D & E)** The WT T6- and WT T6+ strains were grown in M9-media containing Casamino acid

1194 supplemented with either MnCl<sub>2</sub>, ZnSO<sub>4</sub>, FeCl<sub>3</sub>, or altogether (250 µM each) till the mid-log

1195 phase (OD<sub>600</sub>~0.6) and incubated further with MV (250 µM) or H<sub>2</sub>O<sub>2</sub> (500 µM) for 2 h. Cells

1196 were washed and spotted on LB-agar plate supplemented with MV (100 µM) or H<sub>2</sub>O<sub>2</sub> (500 µM)

1197 alone. After incubation at 37°C overnight (O/N), the images were captured using a gel

1198 documentation system (Biorad).

1199 **Figure S2: pAB3 has no role in mitigating oxidative stress. Related to Figure 1. (A)** The

1200 presence of both *tetR1* and *tetR2* (present in pAB3) and *hcp* in the genome of the indicated

1201 strains were confirmed by PCR. **(B)** pAB3 was transformed into the WT T6+ competent cells



1202 and the transformants were confirmed by streaking on LB agar plate containing  
1203 sulfamethoxazole/trimethoprim (S&T; 30 µg/mL and 5 µg/mL, respectively), where the cells  
1204 that do not have pAB3 will not grow. **(C)** Growth of WT T6-, WT T6+, and WT T6+-pAB3 cells  
1205 in LB supplemented with MV (at a final concentration of 150 µM). The data represent four  
1206 biological replicates in technical triplicate with a standard deviation (SD) of the mean.

1207 **Figure S3. Deletion of *mntH* leads to an increase in T6SS expression in *A. baumannii***  
1208 **under oxidative stress. Related to Figure 2. (A)** Uncropped Western blot images. Black  
1209 boxes indicate the area included in Figure 2C. **(B)** Original pictures are captured by a camera  
1210 that is schematically represented in Figure 2G.

1211 **Figure S4. AbsR28 is conserved amongst *Acinetobacter* sp., and deletion of AbsR28**  
1212 **has no polar effect. Related to Figure 3. (A)** Distribution of AbsR28 sRNA homologs among  
1213 *Acinetobacter* sp. GLASSgo software was used to find the sRNA homologs. The phylogenetic  
1214 tree was generated using the Mega version X and visualized in iTol. **(B)** Genomic location of  
1215 AbsR28 in *A. baumannii* ATCC 17978 (NCBI Ref. seq. CP000521.1). **(C)** To check the polar  
1216 effect, WT and  $\Delta$ AbsR28 strains were grown in LB supplemented with MnCl<sub>2</sub> (250 µM) till the  
1217 mid-log phase (OD<sub>600</sub>~0.6) and incubated further with MV (250 µM) for 2 h. RNA was extracted  
1218 from the cells and cDNA was prepared. The expression of A1S\_2828 and A1S\_2839  
1219 transcripts, which are immediate upstream and downstream of AbsR28, respectively, was  
1220 checked by qRT-PCR. No change in the expression in  $\Delta$ AbsR28 for both the genes with  
1221 respect to WT confirms no polar effect of  $\Delta$ AbsR28.

1222 **Figure S5. AbsR28 negatively regulates T6SS in *A. baumannii* and Mn<sup>2+</sup> binds to**  
1223 **AbsR28. Related to Figure 3. (A)** Uncropped Western blot images. Black boxes indicate the  
1224 area included in Figure 3E. **(B)** Isothermal titration calorimetry (ITC) of Mn<sup>2+</sup> to AbsR28 shows  
1225 binding affinity (*K*), entropy ( $\Delta$ S), and enthalpy ( $\Delta$ H) of the sequential binding related to Figure  
1226 3G. **(C)** Lead acetate probing of the 5'-end-labeled [ $\gamma$ -<sup>32</sup>P]ATP AbsR28 in increasing  
1227 concentration of either MnCl<sub>2</sub>, MgCl<sub>2</sub>, or ZnSO<sub>4</sub> provided in structure buffer. Boxes indicate  
1228 bands that were altered upon increasing MnCl<sub>2</sub> concentration. Lanes indicated as T1 and OH

1229 ladders were obtained from the same labeled AbsR28 after incubation with RNase T1 and  
1230 hydroxyl anions, respectively. RNase T1 digestion was performed at both 0.1 and 1.0 U  
1231 concentrations. The position of cleaved G residues is marked on the left of the gel.

1232 **Figure S6. AbsR28 base pair with *tssM* mRNA in the presence of  $Mn^{2+}$ . Related to Figure**  
1233 **4. (A)** Complete lanes of gel retardation assay. Black boxes indicate the area included in  
1234 Figures 4B and 4C.

1235 **Figure S7. The  $Mn^{2+}$ -dependent base pairing of AbsR28 and *tssM* mRNA results in T6SS**  
1236 **repression during infection in the host. Related to Figure 5. (A)** Hcp secretion profile of  
1237 lung homogenates isolated from the mice ( $n = 3$ ) infected with either WT T6-, WT T6+,  $\Delta mntH$ ,  
1238 or  $\Delta$ AbsR28 strains were confirmed by Western blot.

1239 **Figure S8. The expression of T6SS is silent in most of the tested *Acinetobacter* sp. (A)**  
1240 The presence of AbsR28 and *hcp* in the genome of the indicated strains was confirmed by  
1241 PCR. **(B)** Hcp secretion profile of the mentioned strains grown in LB broth supplemented with  
1242 MV and  $MnCl_2$  (250  $\mu$ M) were confirmed by Western blot of culture supernatants. Purified  
1243 His<sub>6</sub>-Hcp was used as a positive control for Western Blot.

1244

1245

1246

1247

1248

1249

1250

1251

1252

1253 SUPPLEMENTARY FIGURES

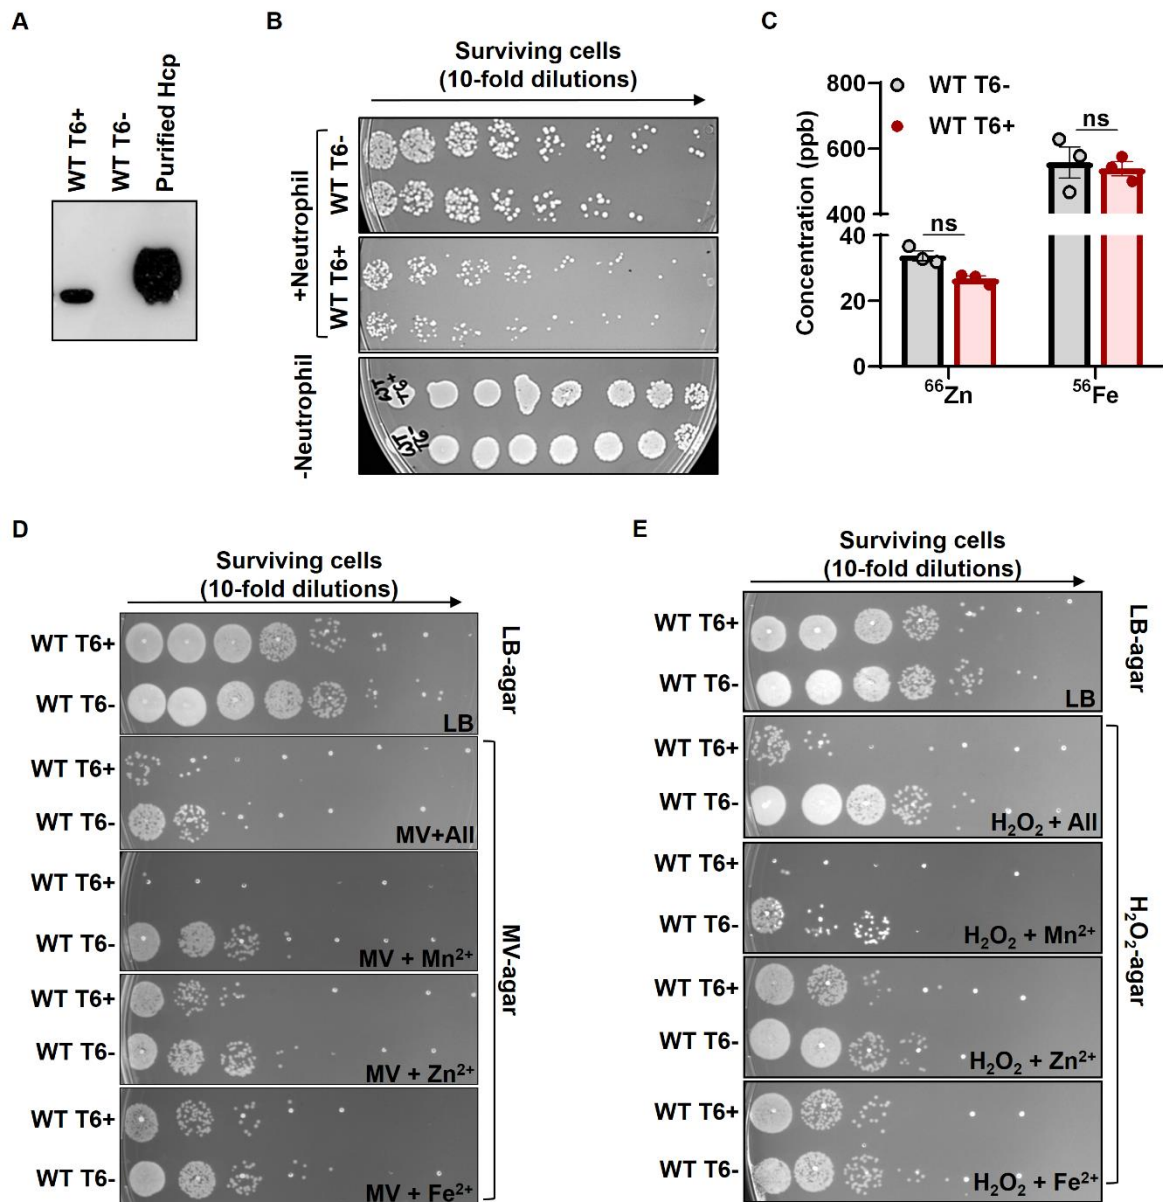

1254 Figure S1

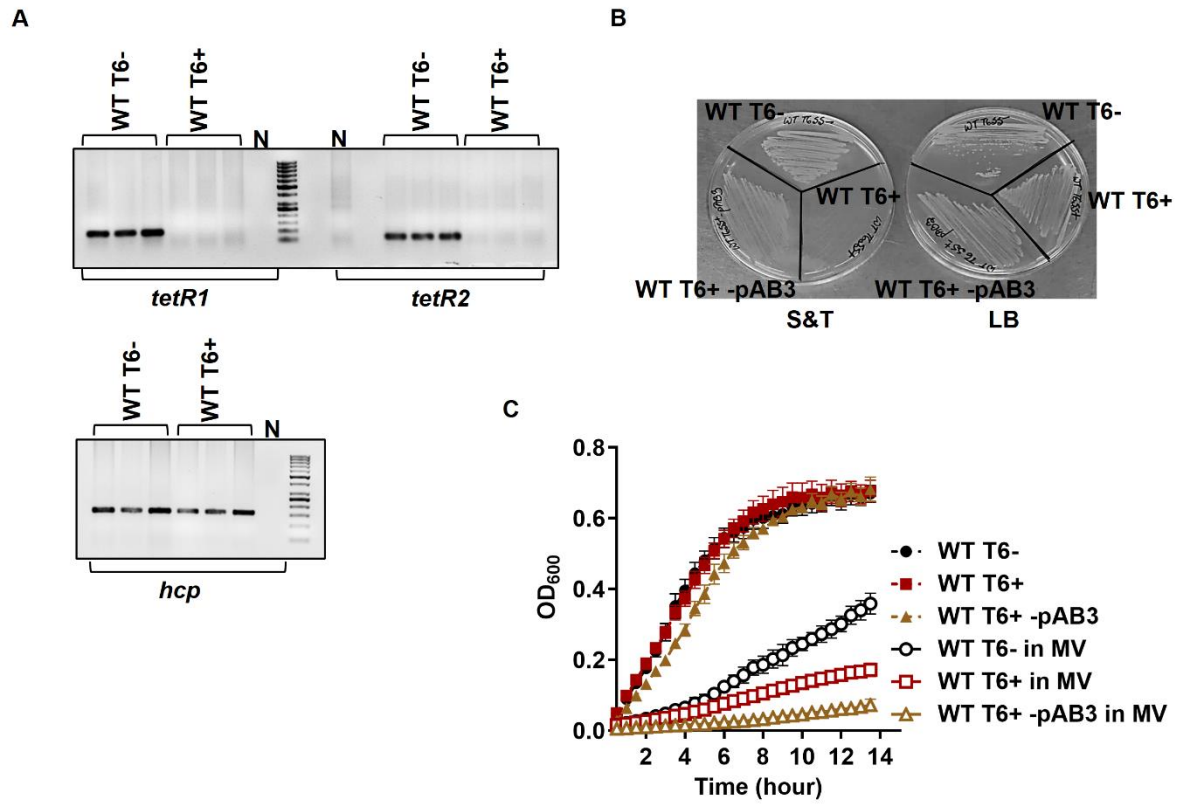

1255

**Figure S2**

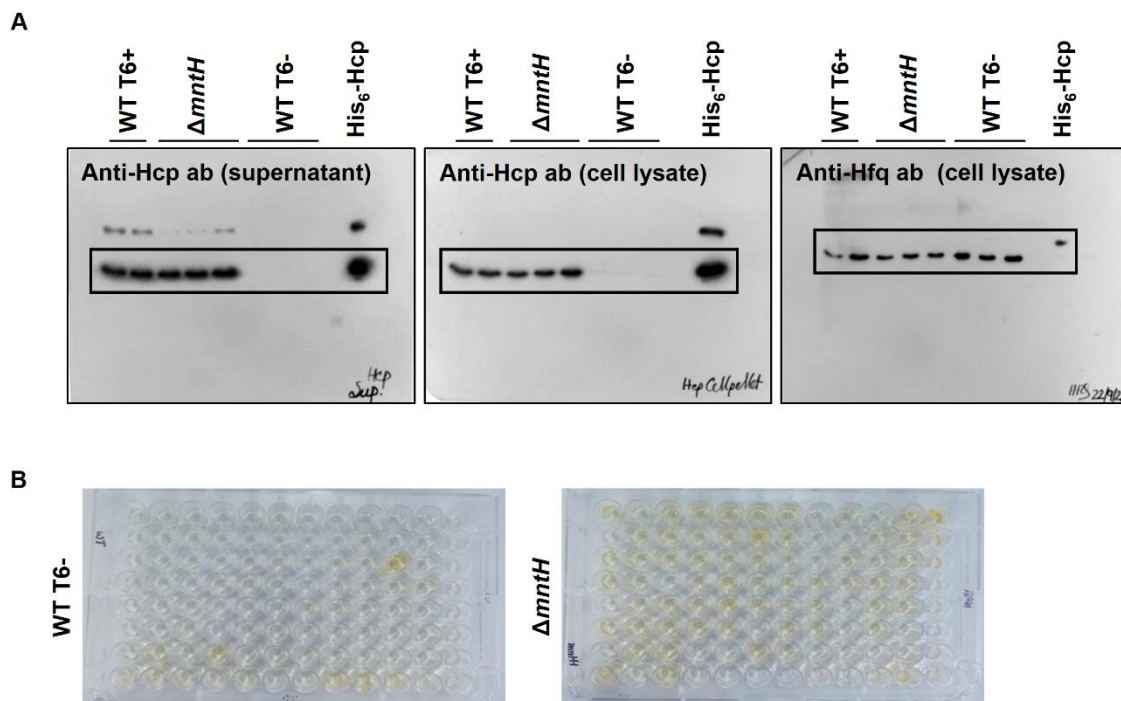

1256  
1257

**Figure S3**

**A**

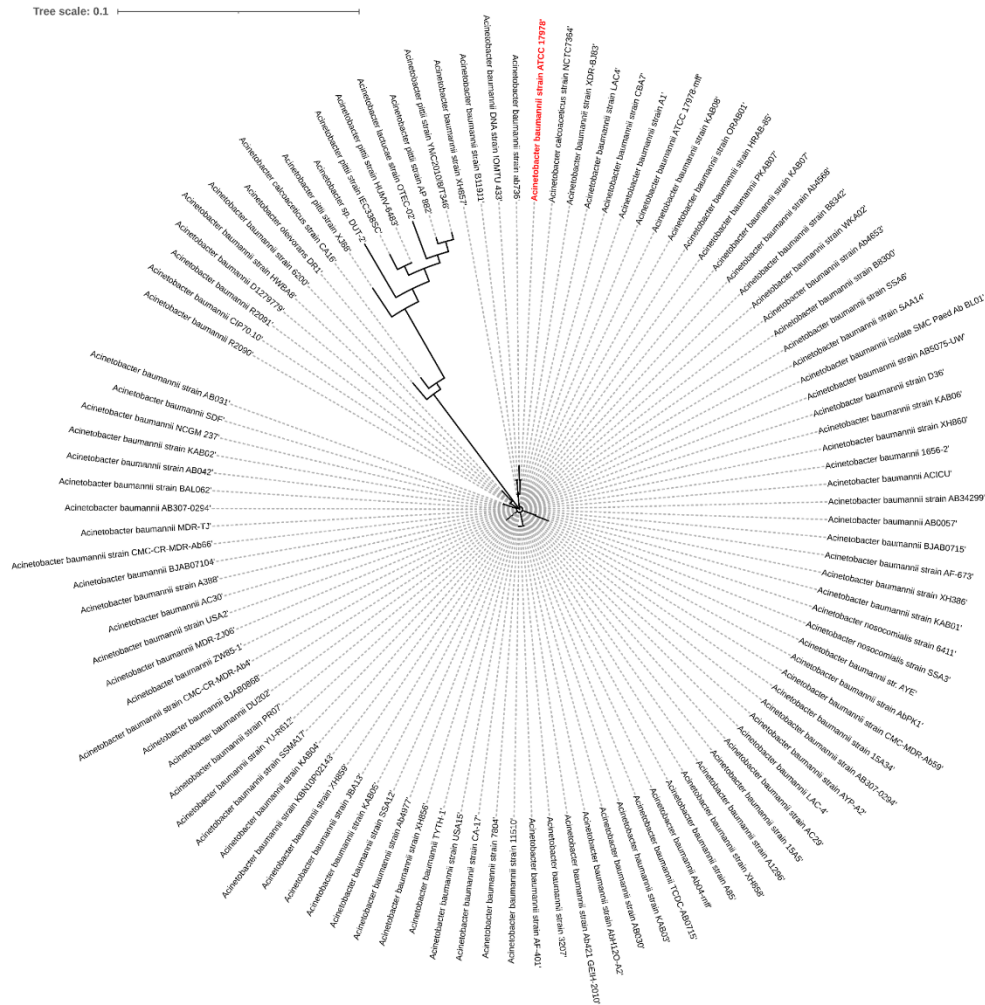

**B**

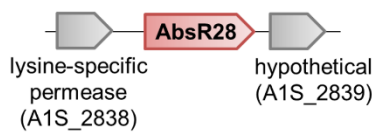

**C**

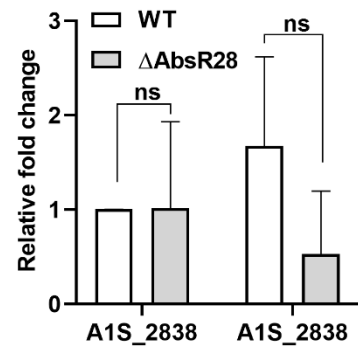

1258

**Figure S4**

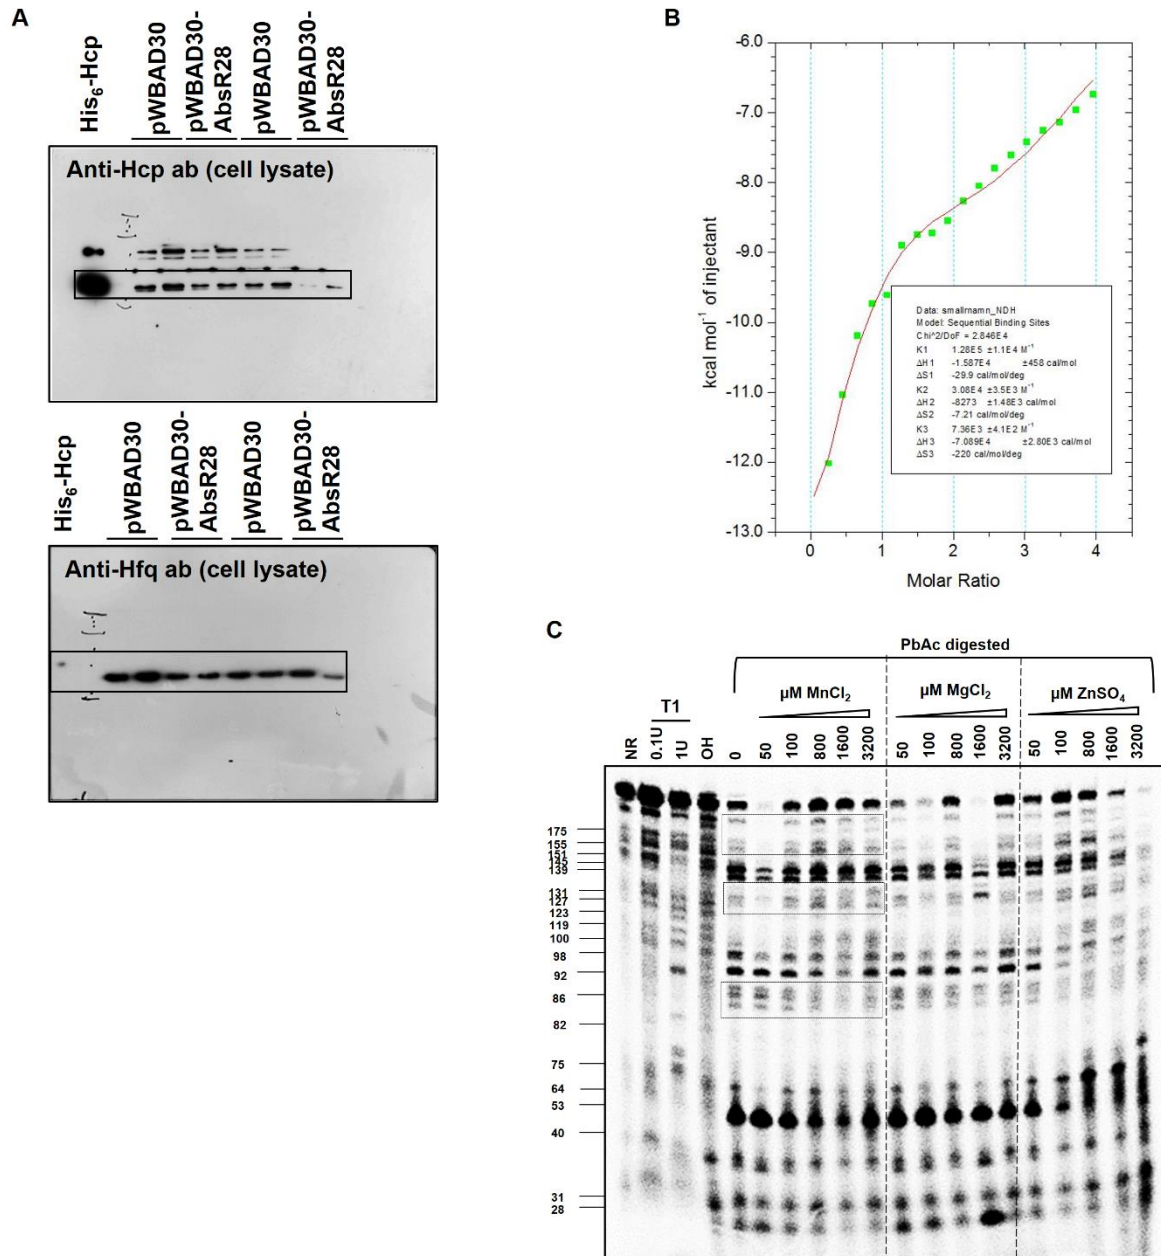

1259 **Figure S5**

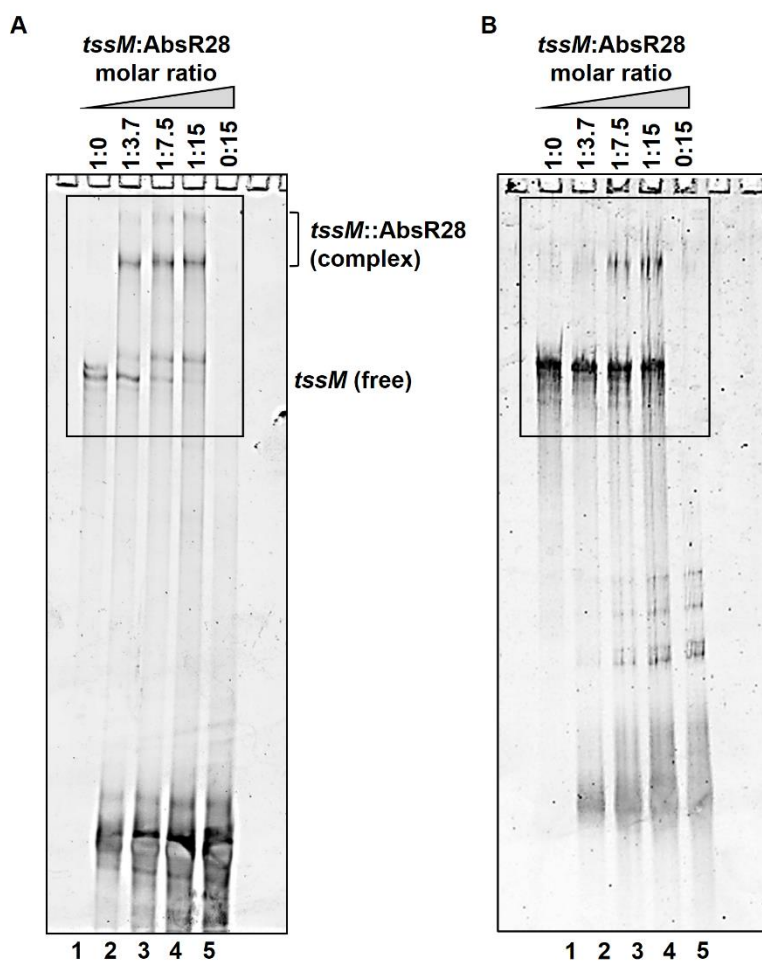

1260

**Figure S6**



A

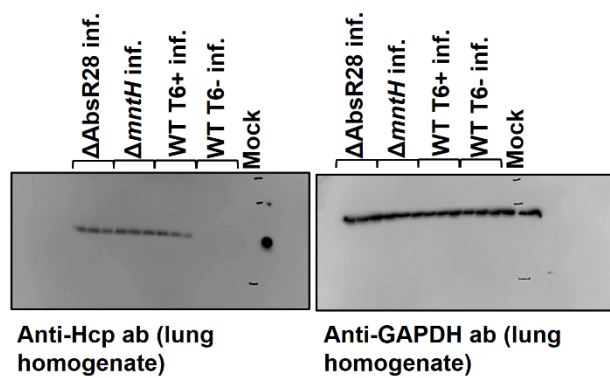

1263

Figure S7

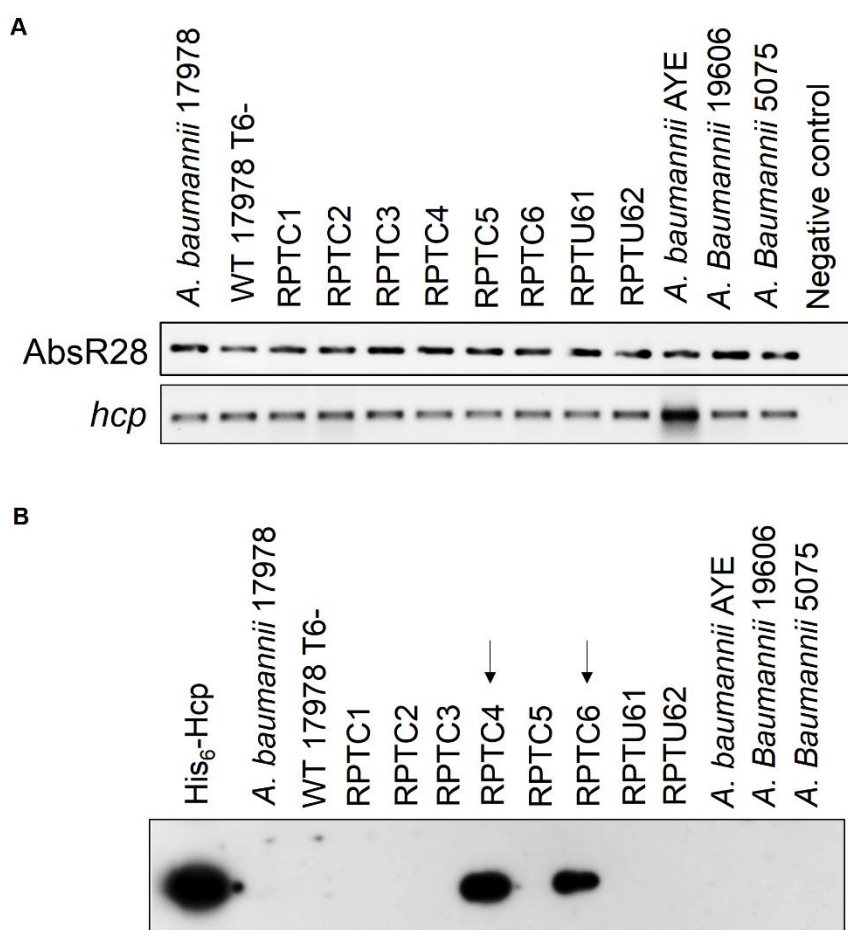

1264

**Figure S8**

**Table 1. Oligonucleotides were used in this study. Related to Figures 1, 2, 3, 4, S2, S4, S5, S6, S7, and Methods.**

| Primer name       | Sequence (5' - 3')                   | Description                                                                                         | Reference  |
|-------------------|--------------------------------------|-----------------------------------------------------------------------------------------------------|------------|
| UP437bpFPMntH     | ATGCGTCGACAATTAACTGAAGTGGC           | Forward primer for cloning <i>mntH</i> 437 bp upstream into pUC18                                   | This study |
| UP437bpRPMntH     | ACTCTAGATTAATGCGTTCCCTCATCCATTTG     | Reverse primer for cloning <i>mntH</i> 437 bp upstream into pUC18                                   | This study |
| DN500bpFPMntH     | ATGGTACCAGACGACATGAATTGATAAG         | Forward primer for cloning <i>mntH</i> 500 bp downstream into pUC18                                 | This study |
| DN500bpRPMntH     | ATGGAATTCAACTCGTGCTTGCTCG            | Reverse primer for cloning <i>mntH</i> 500 bp downstream into pUC18                                 | This study |
| UP125bpFPMntH     | ATGGGGAACAGGGAACTCTTTGTCAT           | Forward primer for the amplification of <i>mntH</i> 125 bp upstream                                 | This study |
| DN125bpRPMntH     | ACCAGCATGAAAACCAACAAGCAAT            | Reverse primer for the amplification of <i>mntH</i> 125 bp downstream                               | This study |
| UP498bpFPAbsR28   | TAAGTCGACATATGCAACTACATTCATTGCTGC    | Forward primer for cloning AbsR28 498 bp upstream into pUC18                                        | This study |
| UP498bpRPAbsR28   | TTATCTAGAGAACGGATTTTACCTGTTTT        | Reverse primer for cloning AbsR28 498 bp upstream into pUC18                                        | This study |
| DN501bpFPAbsR28   | TATGGTACCAAATAAGAGAATAATTATGGGCAT    | Forward primer for cloning AbsR28 501 bp downstream into pUC18                                      | This study |
| DN501bpRPAbsR28   | TATGAATTCCTAAAGTGCCAGCTGTTTT         | Reverse primer for cloning AbsR28 501 bp downstream into pUC18                                      | This study |
| UP126bpFPAbsR28   | ATTAATTCCTTACGATCAAATGGATGTA AAC     | Forward primer for the amplification of AbsR28 126 bp upstream                                      | This study |
| DN126bpRPAbsR28   | TGTGCCATTTTCTTGAGTTGTTCAATACTT       | Reverse primer for the amplification of AbsR28 126 bp downstream                                    | This study |
| AprF-Bam          | ATCAGGATCCGTCGACCTGCAGTTC            | Forward primer for cloning Apr-FRT into pUC18                                                       | Lab stock  |
| AprR-Kpn          | ATGGTACCGTGTAGGCTGGAGCTGCTTC         | Reverse primer for cloning Apr-FRT into pUC18                                                       | Lab stock  |
| Kan FP pWBAD30    | TTCGATCGGAACTTCAAGATCCCCTCAC         | Forward primer for cloning Kanamycin resistance marker into pBAD30                                  | Lab stock  |
| Kan RP pWBAD30    | TTCGATCGTTCTCGAGAAGTATAGGAACTTCAGAGC | Reverse primer for cloning Kanamycin resistance marker containing XhoI restriction site into pBAD30 | Lab stock  |
| pW FP             | TGTCTCGAGGATCGTAGAAATATCTATGATTATC   | Forward primer for cloning <i>A. baumannii</i> ori into pBAD30-kan <sup>R</sup>                     | Lab stock  |
| pW RP             | TGTCTCGAGGGATTTT AACATTTTGCGTTGTT C  | Reverse primer for cloning <i>A. baumannii</i> ori into pBAD30-kan <sup>R</sup>                     | Lab stock  |
| AbsR28 FP pWBAD30 | AGGAATTCGTCAAAAACCTTGATCTTTAG        | Forward primer for cloning AbsR28 into pWBAD30-kan <sup>R</sup>                                     | This study |

|                      |                                                  |                                                                    |            |
|----------------------|--------------------------------------------------|--------------------------------------------------------------------|------------|
| AbsR28 RP<br>pWBAD30 | CCCAAGCTTATTGTCC<br>GAATAGGAATAAAAAA<br>ACCTAGCG | Reverse primer for cloning<br>AbsR28 into pWBAD30-kan <sup>R</sup> | This study |
| RT <i>mntH</i> FP    | GCAGTTCGCGGTGGT<br>ATAGA                         | qRT-PCR forward primer for <i>mntH</i>                             | This study |
| RT <i>mntH</i> RP    | TAGCTCAACGACTTC<br>GCCAG                         | qRT-PCR reverse primer for <i>mntH</i>                             | This study |
| RT <i>znuB</i> FP    | ATTTGAGGCTGCCAA<br>TAGCG                         | qRT-PCR forward primer for <i>znuB</i>                             | This study |
| RT <i>znuB</i> RP    | AAACGATGCTTTGCTT<br>GCCC                         | qRT-PCR reverse primer for <i>znuB</i>                             | This study |
| RT <i>tonB</i> FP    | CCAGATCCATCGCCA<br>AAACG                         | qRT-PCR forward primer for <i>tonB</i>                             | This study |
| RT <i>tonB</i> RP    | GGGTTACGCGCACGT<br>TAGTA                         | qRT-PCR reverse primer for <i>tonB</i>                             | This study |
| RT <i>tssB</i> FP    | TCAGCGAATTCGACC<br>TCCAC                         | qRT-PCR forward primer for <i>tssB</i>                             | Lab stock  |
| RT <i>tssB</i> RP    | GTACGCTCAAGCTCA<br>GATGC                         | qRT-PCR reverse primer for <i>tssB</i>                             | Lab stock  |
| RT <i>tssC</i> FP    | GTTGGTGTGCTGCTA<br>TTCGC                         | qRT-PCR forward primer for <i>tssC</i>                             | This study |
| RT <i>tssC</i> RP    | CTCTTTTTCACGGCGA<br>TCCG                         | qRT-PCR reverse primer for <i>tssC</i>                             | This study |
| RT <i>hcp</i> FP     | CTTCAAGTAGTGTAG<br>GCGGC                         | qRT-PCR forward primer for <i>hcp</i>                              | Lab stock  |
| RT <i>hcp</i> RP     | CCATTTGCACGATAG<br>AAGTC                         | qRT-PCR reverse primer for <i>hcp</i>                              | Lab stock  |
| RT <i>tssE</i> FP    | GTGGGGCTTTCTACA<br>GCCAA                         | qRT-PCR forward primer for <i>tssE</i>                             | This study |
| RT <i>tssE</i> RP    | ACCGTATTTGTCTTA<br>GCCGAG                        | qRT-PCR reverse primer for <i>tssE</i>                             | This study |
| RT <i>tssF</i> FP    | TAGTAGCTTGCGGAG<br>ACGTG                         | qRT-PCR forward primer for <i>tssF</i>                             | Lab stock  |
| RT <i>tssF</i> RP    | GATCACACGCCACTG<br>TTCAC                         | qRT-PCR reverse primer for <i>tssF</i>                             | Lab stock  |
| RT <i>tssG</i> FP    | ACCTGGTGCAGTCCA<br>ACTTT                         | qRT-PCR forward primer for <i>tssG</i>                             | This study |
| RT <i>tssG</i> RP    | AAAAAGCGCCTTGCC<br>CTAAG                         | qRT-PCR reverse primer for <i>tssG</i>                             | This study |
| RT <i>tssM</i> FP    | CTCCGGCAACCAATC<br>AGTCT                         | qRT-PCR forward primer for <i>tssM</i>                             | This study |
| RT <i>tssM</i> RP    | AGCTGTAATACGAGC<br>ACCCG                         | qRT-PCR reverse primer for <i>tssM</i>                             | This study |
| RT <i>paar</i> FP    | TGGCTAGCCCTTACA<br>TTACG                         | qRT-PCR forward primer for <i>paar</i>                             | Lab stock  |
| RT <i>paar</i> RP    | CGTTTTATGCGCCGG<br>ACAAG                         | qRT-PCR reverse primer for <i>paar</i>                             | Lab stock  |
| RT <i>tssH</i> FP    | CTCGAGTGCAATTAT<br>GCAGGC                        | qRT-PCR forward primer for <i>tssH</i>                             | This study |
| RT <i>tssH</i> RP    | CACAACTCTCATGCG<br>CCCTA                         | qRT-PCR reverse primer for <i>tssH</i>                             | This study |
| RT <i>tssA</i> FP    | CAATCGCGAGCAAGC<br>AATGA                         | qRT-PCR forward primer for <i>tssA</i>                             | This study |
| RT <i>tssA</i> RP    | GCTAACCATTCATGCA<br>GCGG                         | qRT-PCR reverse primer for <i>tssA</i>                             | This study |
| RT <i>tssK</i> FP    | GCAGACCCACGAGTT<br>GATTC                         | qRT-PCR forward primer for <i>tssK</i>                             | Lab stock  |
| RT <i>tssK</i> RP    | CTCACACCCGAACGT<br>ACTGG                         | qRT-PCR reverse primer for <i>tssK</i>                             | Lab stock  |

|                    |                                                       |                                                                           |            |
|--------------------|-------------------------------------------------------|---------------------------------------------------------------------------|------------|
| RT <i>tssL</i> FP  | TAACCCAGCAAGACC<br>CAAGC                              | qRT-PCR forward primer for <i>tssL</i>                                    | This study |
| RT <i>tssL</i> RP  | TCGCTCTTTTCCACGA<br>CTACG                             | qRT-PCR reverse primer for <i>tssL</i>                                    | This study |
| RT <i>vgrG</i> FP  | TGACCGTCCGTTTGT<br>AGTGG                              | qRT-PCR forward primer for <i>vgrG</i><br>(A1S_0550)                      | This study |
| RT <i>vgrG</i> RP  | TGACCGCATGGCTAC<br>TTTGT                              | qRT-PCR reverse primer for <i>vgrG</i><br>(A1S_0550)                      | This study |
| RT <i>tetR1</i> FP | ATGCTGTAAGCCTTT<br>GTCTCT                             | Forward primer to check for <i>tetR1</i><br>in pAB3                       | This study |
| RT <i>tetR1</i> RP | CCGTTTCGTGGTCCA<br>CACAT                              | Reverse primer to check for <i>tetR1</i><br>in pAB3                       | This study |
| RT <i>tetR2</i> FP | CAACCTCTTGGGCCA<br>GTGTG                              | Forward primer to check for <i>tetR2</i><br>in pAB3                       | This study |
| RT <i>tetR2</i> RP | GGTCCACGTGCCACT<br>GATAG                              | Reverse primer to check for <i>tetR2</i><br>in pAB3                       | Lab stock  |
| RT AbsR1 FP        | GGTTAAGTAAAGAATT<br>TTAAAG                            | qRT-PCR forward primer for<br>AbsR1                                       | Lab stock  |
| RT AbsR1 RP        | CTCTACCGAAGCAAA<br>AGC                                | qRT-PCR reverse primer for<br>AbsR1                                       | Lab stock  |
| RT AbsR11 FP       | AACGTAGCGGTGTCA<br>CATCA                              | qRT-PCR forward primer for<br>AbsR11                                      | Lab stock  |
| RT AbsR11 RP       | GGTGAAGAGTCCCAT<br>TCCCT                              | qRT-PCR reverse primer for<br>AbsR11                                      | Lab stock  |
| RT AbsR25 FP       | AAATCATGTGTAGGA<br>CCGAG                              | qRT-PCR forward primer for<br>AbsR25                                      | Lab stock  |
| RT AbsR25 RP       | AAAGCCTACTCAAGA<br>AGCAG                              | qRT-PCR reverse primer for<br>AbsR25                                      | Lab stock  |
| RT AbsR28 FP       | AAGGAGGACATCATG<br>CCAAC                              | qRT-PCR forward primer for<br>AbsR28                                      | Lab stock  |
| RT AbsR28 RP       | AATTCGAGCATTCGG<br>ACAAG                              | qRT-PCR reverse primer for<br>AbsR28                                      | Lab stock  |
| RT AbsR29 FP       | CGCAGTCAATCAATC<br>AGTGCATTT                          | qRT-PCR forward primer for<br>AbsR29                                      | Lab stock  |
| RT AbsR29 RP       | GATGCAAAGAGCTTG<br>CCAAT                              | qRT-PCR reverse primer for<br>AbsR29                                      | Lab stock  |
| RT <i>hfq</i> FP   | CCTTGACTACCACCC<br>TGAGC                              | qRT-PCR forward primer for <i>hfq</i>                                     | Lab stock  |
| RT <i>hfq</i> RP   | TCTACAGTTGTTCCAG<br>CTCGT                             | qRT-PCR reverse primer for <i>hfq</i>                                     | Lab stock  |
| RT 16s FP          | AGAGGGTGCGAGCGT<br>TAATC                              | qRT-PCR housekeeping gene<br>forward primer                               | Lab stock  |
| RT 16s RP          | GTTAAGCTCGGGGAT<br>TTCAC                              | qRT-PCR housekeeping gene<br>reverse primer                               | Lab stock  |
| RT A1S_2838 FP     | GGCACCATTTCGTAGG<br>TGGTT                             | Forward primer to check the polar<br>effect of $\Delta$ AbsR28 upstream   | This study |
| RT A1S_2838 RP     | AGCGGAATCGTCTTC<br>TTCGG                              | Reverse primer to check the polar<br>effect of $\Delta$ AbsR28 upstream   | This study |
| RT A1S_2839 FP     | ATCCGGGTCTTGTCC<br>GAATG                              | Forward primer to check the polar<br>effect of $\Delta$ AbsR28 downstream | This study |
| RT A1S_2839 RP     | CCTGAATGGAGCATC<br>ACCCA                              | Reverse primer to check the polar<br>effect of $\Delta$ AbsR28 downstream | This study |
| AbsR28 IVT FP      | CCGGAATTCTAATAC<br>GACTCACTATAGGGA<br>GATTTTCAACGGCAC | Forward primer for AbsR28 in<br>vitro transcription                       | This study |
| AbsR28 IVT RP      | CCCAAGCTTATTGTCC<br>GAATAGGAATAAAAAA<br>ACCTAGCG      | Reverse primer for AbsR28 in<br>vitro transcription                       | This study |

|                    |                                                       |                                                       |            |
|--------------------|-------------------------------------------------------|-------------------------------------------------------|------------|
| FP IVT <i>tssM</i> | TAATACGACTCACTAT<br>AGGGGTTTGCACAAA<br>CATCTGTTGAACCA | Forward primer for <i>tssM</i> in vitro transcription | This study |
| RP IVT <i>tssM</i> | CGTACTCTGCTTGGG<br>TATCCTTTT                          | Reverse primer for <i>tssM</i> in vitro transcription | This study |

**Table 2. Bacterial strains were used in this study.**

| Bacterial strains                                                       | Source                                | Identifier                    |
|-------------------------------------------------------------------------|---------------------------------------|-------------------------------|
| <i>Acinetobacter baumannii</i> ATCC 17978                               | ATCC                                  | WT                            |
| <i>Acinetobacter baumannii</i> ATCC 17978 T6-                           | This study                            | WT T6-                        |
| <i>Acinetobacter baumannii</i> ATCC 17978 T6+                           | This study                            | WT T6+                        |
| <i>Acinetobacter baumannii</i> ATCC 17978 $\Delta$ <i>mntH</i>          | This study                            | $\Delta$ <i>mntH</i>          |
| <i>Acinetobacter baumannii</i> ATCC 17978 $\Delta$ AbsR28               | This study                            | $\Delta$ AbsR28               |
| <i>Acinetobacter baumannii</i> ATCC 17978 $\Delta$ AbsR28-pWBAD30       | This study                            | $\Delta$ AbsR28-pWBAD30       |
| <i>Acinetobacter baumannii</i> ATCC 17978 $\Delta$ AbsR28-pWBAD30AbsR28 | This study                            | $\Delta$ AbsR28-pWBAD30AbsR28 |
| <i>Acinetobacter baumannii</i> ATCC 17978 $\Delta$ <i>tssM</i>          | R.P. lab                              | $\Delta$ <i>tssM</i>          |
| <i>Escherichia coli</i> DH5 $\alpha$                                    | Invitrogen, USA                       | <i>E. coli</i> DH5 $\alpha$   |
| <i>Escherichia coli</i> DH5 $\alpha$ -pNYL GFP                          | Prof. N.K. Navani, IIT Roorkee, India | <i>E. coli</i> -pNYL GFP      |
| <i>Escherichia coli</i> J53                                             | Dr. Sanath Kumar H, ICAR-CIFE, India  | <i>E. coli</i> J53            |
| <i>Pseudomonas aeruginosa</i> PAO1                                      | Prof. N.K. Navani, IIT Roorkee, India | <i>P. aeruginosa</i>          |

**Table 3. Plasmids were used in this study.**

| Plasmids                                    | Source                                                    | Identifier     |
|---------------------------------------------|-----------------------------------------------------------|----------------|
| pUC18                                       | Thermo Scientific, USA                                    | N/A            |
| pUC18-UP <i>mntH</i> -AprFRT-DN <i>mntH</i> | This study                                                | N/A            |
| pUC18-UPAbsR28-AprFRT-DNAbsR28              | This study                                                | N/A            |
| pMDIAI                                      | Addgene                                                   | N/A            |
| pAT02                                       | Prof. Bryan Davies, University of Texas, San Antonio, USA | N/A            |
| pAT03                                       | Prof. Bryan Davies, University of Texas, San Antonio, USA | N/A            |
| pKD4                                        | (Datsenko and Wanner, 2000)                               | N/A            |
| pBAD30-amp <sup>R</sup>                     | Prof. Eric D. Brown, McMaster University, Hamilton, ON    | N/A            |
| pBAD30-kan <sup>R</sup>                     | This study                                                | pBAD30         |
| pWBAD30-kan <sup>R</sup>                    | This study                                                | pWBAD30        |
| pWBAD30-kan <sup>R</sup> -AbsR28            | This study                                                | pWBAD30-AbsR28 |
